# Supplementary material for: Magnetic anisotropy in trigonal planar Fe(ii) bis(trimethylsilyl)amido complexes of the type [Fe{N(SiMe3)2}2L]—experiment and theory
Source: Royal Society of Chemistry journal article supplement (doi:10.1039/c9dt01702j), 2019-01-01
Supplement: c9dt01702j1.pdf [file c9dt01702j1.pdf]

## Electronic Supplementary Information (ESI)

### Magnetic Anisotropy in Trigonal Planar Fe(II) Bis(trimethylsilyl)amido Complexes of the Type [Fe{N(SiMe<sub>3</sub>)<sub>2</sub>}<sub>2</sub>L] — Experiment and Theory

Tilman Bodenstein,<sup>\*a,b</sup> Andreas Eichhöfer,<sup>\*a</sup>

[a] Institut für Nanotechnologie, Karlsruher Institut für Technologie (KIT), Campus Nord, Hermann-von-Helmholtz-Platz 1, 76344 Eggenstein-Leopoldshafen, Germany

Tel. 49-(0)721-608-26371

Fax: 49-(0)721-608-26368

e-mail: [andreas.eichhoefer@kit.edu](mailto:andreas.eichhoefer@kit.edu)

[b] present address: Hylleraas Center, Department of Chemistry, University of Oslo, P. O. Box 1033, 0315 Oslo, Norway; former address: Theoretical Chemistry, Department of Chemistry, Aarhus University, Langelandsgade 140, 8000 Aarhus C, Denmark

## Content

**Equations** for the simulation of the dc and ac magnetic data

**Table S1** Crystallographic Data for **1–5**.

**Figure S1–S5**. Molecular structures of **1–5** in the crystal.

**Figure S6–S8**. Measured and simulated X-ray powder patterns for **1–4**.

**Figure S9, S10**. Electronic spectra of **1–4**.

**Figure S11, S12**. Plots of magnetization  $M$  versus  $H$  for **1–4** measured between 2 and 25 K and the corresponding fittings.

**Figure S13, S15, S17** Frequency dependence of the in-phase  $\chi'$  and out-of-phase  $\chi''$  component of the ac magnetic susceptibility at 2 K under different dc fields for **1–3**.

**Figure S14, S16, S18** a) Field dependence of the inverse relaxation time  $\tau^{-1}$  at  $T = 2$  K for **1–3**, b) Field dependence of the distribution coefficient  $\alpha$  at  $T = 2$  K.

**Table S2** Results of the fittings of the field dependent ac magnetic data of **1–3**.

**Figure S19**. Frequency dependence of the in-phase  $\chi'$  component of the ac magnetic susceptibility at 1500 Oe at different temperatures for **1–3**.

**Figure S20–S22**. a) Cole-Cole plots for  $\chi''$  vs  $\chi'$  of **1–3** at different temperatures b) temperature dependence of the distribution coefficient  $\alpha$ .

**Table S3** Spin-free energies (in  $\text{cm}^{-1}$ ) of the lowest five quintet states of complexes **1–7** from ab initio calculations.

**Table S4** Spin-orbit coupled RASSI energies of the lowest 11 states of complexes **1–7**.

**Table S5** RASSI wave function analysis/decomposition of **1–7**.

**Table S6** Effective Spin Hamiltonian parameters for the lowest pseudo spin multiplett ( $S = 2$ ) of **1–7** from RASSI wave functions.

**Table S7** Main values of the  $g$ -tensor and orientation of the corresponding magnetic main axes of **1–7**.

**Figure S23–S26**. Temperature dependence of  $\chi T$  for **1–7** calculated by quantum chemical methods.

**Figure S27, S28**. Comparison of the quantum chemically calculated and measured magnetization curves  $M$  versus  $H$  of **1–4**.

**Figure S29**. Relation between  $g_z$  and the splitting  $\Delta\varepsilon$ .

**Table S8** d-orbital splittings of **1–7** derived from different quantum chemical methods.

**Table S9** Coefficients of the crystal field Hamiltonian decomposition for complexes **1–7**.

**Figure S30**. Simulation of the influence of  $B_2^2$  and  $B_4^3$  as well as  $B_2^2$  and  $B_4^4$  parameters in the effective Hamiltonian on the symmetry of its ground state for fixed axial parameters.

**Table S10** Eigenvalues  $E$  (in  $\text{cm}^{-1}$ ) of the Spin Hamiltonian.

**List of compounds:**

- (1)  $[\text{Fe}(\text{N}(\text{SiMe}_3)_2)_2(\text{PPh}_3)]$
- (2)  $[\text{Fe}(\text{N}(\text{SiMe}_3)_2)_2(\text{PMe}_3)]$
- (3)  $[\text{Fe}(\text{N}(\text{SiMe}_3)_2)_2(\text{AsPh}_3)]$
- (4)  $[\text{Fe}(\text{N}(\text{SiMe}_3)_2)_2(\text{OPPh}_3)]$
- (5)  $[\text{Fe}(\text{N}(\text{SiMe}_3)_2)_2(\text{Py})]$
- (6)  $[\text{Fe}(\text{N}(\text{SiMe}_3)_2)_2(\text{THF})]$
- (7)  $[\text{Fe}(\text{N}(\text{SiMe}_3)_2)_2(\text{PCy}_3)]$

## Equations for the simulation of the dc and ac magnetic data

Simulations of the experimental dc magnetic data were performed with the PHI program<sup>1</sup> diagonalizing a spin Hamiltonian in the form

$$H = H_{CF} + H_{ZEE} \quad (S1)$$

$$H_{CF} = \sum_{k=2} \sum_{q=-k}^k B_k^q O_k^q$$

$$H_{ZEE} = \mu_B \vec{S} \mathbf{g} \vec{B}$$

$D$ : axial zero-field splitting (ZFS) parameter

$$D = 3B_2^0$$

$E$ : rhombic ZFS parameter

$$E = B_2^2$$

$\vec{S}$ : spin vector

$\vec{B}$ : magnetic field vector

$\mathbf{g}$ : g-tensor

$\mu_B$ : Bohr magneton

In all cases, the goodness of fit  $R$  for a particular data set is calculated following the least squares approach.

Relaxation times  $\tau$  and the distribution coefficient  $\alpha$  of the relaxation processes at a given temperature were derived from simultaneous fits of the frequency dependent curves of  $\chi'$  and  $\chi''$  vs  $\nu$  according to:<sup>2</sup>

$$\chi'(\omega) = \chi_S + \frac{(\chi_T - \chi_S) [1 + (\omega\tau)^{1-\alpha} \sin(\alpha\pi/2)]}{1 + 2(\omega\tau)^{1-\alpha} \sin(\alpha\pi/2) + (\omega\tau)^{2(1-\alpha)}} \quad (S2)$$

$$\chi''(\omega) = \frac{(\chi_T - \chi_S)(\omega\tau)^{1-\alpha} \cos(\alpha\pi/2)}{1 + 2(\omega\tau)^{1-\alpha} \sin(\alpha\pi/2) + (\omega\tau)^{2(1-\alpha)}} \quad (S3)$$

with

$\omega = 2\pi\nu$  angular frequency

$\chi_T$  = isothermal susceptibility

$\chi_s$  = adiabatic susceptibility

$\tau$  = magnetization relaxation time

$0 < \alpha < 1$  = width of the distribution of relaxation processes; ( $\alpha = 0$ ; single relaxation process)

The field dependence of  $\tau$  can be modeled by:<sup>2,3</sup>

$$\tau^{-1} = AH^2T + \frac{B_1}{1+B_2H^2} \quad (S4)$$

$A$ : parameter of the direct relaxation mechanism

$H$ : external dc field

$T$ : temperature

$B_1, B_2$ : parameters of the quantum tunneling mechanism

The preexponential factor  $\tau_0$  and the effective energy  $U_{\text{eff}}$  of the spin reversal barrier were deduced from a linear fit of  $\ln \tau$  against the inverse temperature  $T^{-1}$  according to:<sup>4</sup>

$$\ln \tau = \ln \tau_0 \frac{U_{\text{eff}}}{k} T^{-1} \quad (S5)$$

The temperature dependence of the relaxation times  $\tau$  can be fit as a sum of contributions of the direct, Raman, quantum tunneling, and Orbach relaxation mechanism:<sup>3,5</sup>

$$\tau^{-1} = A_{\text{Dir}}T + \frac{B_1}{1+B_2H^2} + C_{\text{Ram}}T^5 + \frac{1}{\tau_0} \exp\left(\frac{-U_{\text{eff}}}{kT}\right) \quad (S6)$$

$A_{\text{Dir}}$ : parameter of the direct relaxation mechanism

$C_{\text{Ram}}$ : parameter of the Raman relaxation mechanism

$U_{\text{eff}}$ : effective energy barrier

$$\Delta E_{av} = \frac{1}{5} \sum_{i=1}^5 E_{\text{corr}}(i) \quad (S7)$$

Stevens operators used for decomposing the effective Hamiltonian in terms of Racah operators  $R(l,m)$  ( $0 < m \leq l$ ):

$$O_l^{+m} = \frac{1}{\sqrt{2}K_l^m} \sqrt{\frac{2l+1}{4\pi}} (R_l^{-m} + (-1)^m R_l^m) \quad (S8)$$

$$O_l^0 = \frac{1}{K_l^0} \sqrt{\frac{2l+1}{4\pi}} R_l^0 \quad (S9)$$

$$O_l^{-m} = \frac{i}{\sqrt{2}K_l^m} \sqrt{\frac{2l+1}{4\pi}} (R_l^{-|m|} - (-1)^m R_l^{|m|}) \quad (\text{S10})$$

Where the normalization coefficients  $K(l,m)$  of the real spherical harmonics are tabled, see, e. g. ref. 6.

The matrix elements of the Stevens operator equivalents can thus be computed from the Racah operators  $R(l,m)$ , which are given in the pseudo spin basis using Wigner 3j symbols by

$$\langle S, M | R_l^m | S, M' \rangle = \frac{(-1)^{S-M}}{2^l} \begin{pmatrix} S & l & S \\ -M & m & M' \end{pmatrix} \sqrt{\frac{(2S+l+1)!}{(2S-l)!}} \quad (\text{S11})$$

Table S1. Crystallographic Data for [Fe{N(SiMe<sub>3</sub>)<sub>2</sub>}<sub>2</sub>(PPh<sub>3</sub>)] (**1**), [Fe{N(SiMe<sub>3</sub>)<sub>2</sub>}<sub>2</sub>(PMe<sub>3</sub>)] (**2**), [Fe{N(SiMe<sub>3</sub>)<sub>2</sub>}<sub>2</sub>(AsPh<sub>3</sub>)] (**3**) and [Fe{N(SiMe<sub>3</sub>)<sub>2</sub>}<sub>2</sub>(OPPh<sub>3</sub>)] (**4**) and [Fe{N(SiMe<sub>3</sub>)<sub>2</sub>}<sub>2</sub>(py)] (**5**).

|                                                              | <b>1</b>                                                          | <b>2</b>                                                          | <b>3</b>                                                           | <b>4</b>                                                           | <b>5</b>                                                           |
|--------------------------------------------------------------|-------------------------------------------------------------------|-------------------------------------------------------------------|--------------------------------------------------------------------|--------------------------------------------------------------------|--------------------------------------------------------------------|
| sum formula                                                  | C <sub>30</sub> H <sub>51</sub> FeN <sub>2</sub> PSi <sub>6</sub> | C <sub>15</sub> H <sub>45</sub> FeN <sub>2</sub> PSi <sub>4</sub> | C <sub>30</sub> H <sub>51</sub> AsFeN <sub>2</sub> Si <sub>4</sub> | C <sub>30</sub> H <sub>51</sub> FeN <sub>2</sub> OPSi <sub>4</sub> | C <sub>30</sub> H <sub>51</sub> FeN <sub>2</sub> OPSi <sub>4</sub> |
| <i>f</i> w [g/mol]                                           | 638.9                                                             | 452.71                                                            | 682.85                                                             | 654.90                                                             | 455.74                                                             |
| crystal system                                               | triclinic                                                         | orthorhombic                                                      | triclinic                                                          | monoclinic                                                         | orthorhombic                                                       |
| space group                                                  | <i>P</i> -1                                                       | <i>Pna</i> 2(1)                                                   | <i>P</i> -1                                                        | <i>P</i> 2(1)/ <i>c</i>                                            | <i>P</i> 2(1)2(1)2                                                 |
| Cell                                                         |                                                                   |                                                                   |                                                                    |                                                                    |                                                                    |
| <i>a</i> [pm]                                                | 1010.5(2)                                                         | 1831.6(4)                                                         | 1008.44(5)                                                         | 1217.9(2)                                                          | 1104.57(3)                                                         |
| <i>b</i>                                                     | 1333.3(3)                                                         | 1059.9(2)                                                         | 1347.94(6)                                                         | 1540.6(3)                                                          | 34.230(1)                                                          |
| <i>c</i>                                                     | 1372.4(3)                                                         | 1431.3(3)                                                         | 1382.94(7)                                                         | 2029.4(4)                                                          | 1068.70(3)                                                         |
| <i>α</i>                                                     | 90.46(3)                                                          |                                                                   | 90.654(4)                                                          |                                                                    |                                                                    |
| <i>β</i> [°]                                                 | 93.70(3)                                                          |                                                                   | 93.729(4)                                                          | 96.63(3)                                                           |                                                                    |
| <i>γ</i>                                                     | 91.07(3)                                                          |                                                                   | 91.626(4)                                                          |                                                                    |                                                                    |
| <i>V</i> [10 <sup>6</sup> pm <sup>3</sup> ]                  | 1844.7(6)                                                         | 2778.6(10)                                                        | 1874.95(16)                                                        | 3782.3(13)                                                         | 4040.7(2)                                                          |
| <i>Z</i>                                                     | 2                                                                 | 4                                                                 | 2                                                                  | 4                                                                  | 6                                                                  |
| <i>T</i> [K]                                                 | 180(2)                                                            | 180(2)                                                            | 183(2)                                                             | 180(2)                                                             | 200(2)                                                             |
| <i>d</i> <sub>c</sub> [g cm <sup>-3</sup> ]                  | 1.150                                                             | 1.082                                                             | 1.210                                                              | 1.150                                                              | 1.124                                                              |
| <i>μ</i> ( <i>λ</i> ) [mm <sup>-1</sup> ]                    | 0.602                                                             | 0.774                                                             | 1.426                                                              | 0.591                                                              | 0.744                                                              |
| <i>F</i> [000]                                               | 684                                                               | 984                                                               | 720                                                                | 1400                                                               | 1476                                                               |
| 2 $\theta$ <sub>max</sub> [°]                                | 55.5                                                              | 53.5                                                              | 53.5                                                               | 53.5                                                               | 51                                                                 |
| meas rflns                                                   | 19114                                                             | 15898                                                             | 18246                                                              | 37719                                                              | 15719                                                              |
| unique rflns                                                 | 7790                                                              | 5717                                                              | 7864                                                               | 8018                                                               | 7119                                                               |
| <i>R</i> <sub>int</sub>                                      | 0.0455                                                            | 0.0583                                                            | 0.0431                                                             | 0.0549                                                             | 0.0659                                                             |
| rflns with <i>I</i> > 2 $\sigma$ ( <i>I</i> )                | 5774                                                              | 3748                                                              | 6671                                                               | 5508                                                               | 6171                                                               |
| refined params                                               | 509                                                               | 224                                                               | 503                                                                | 367                                                                | 359                                                                |
| <i>R</i> 1( <i>I</i> > 2 $\sigma$ ( <i>I</i> )) <sup>a</sup> | 0.0361                                                            | 0.0393                                                            | 0.0328                                                             | 0.0431                                                             | 0.0438                                                             |
| <i>wR</i> 2(all data) <sup>b</sup>                           | 0.0782                                                            | 0.0913                                                            | 0.0871                                                             | 0.1167                                                             | 0.1143                                                             |
| abs. struct. parameter                                       |                                                                   | 0.46(4)                                                           |                                                                    |                                                                    | 0.40(2)                                                            |

$$^a R1 = \frac{\sum ||F_o| - |F_c||}{\sum |F_o|}, \quad ^b wR2 = \left\{ \frac{\sum [w(F_o^2 - F_c^2)^2]}{\sum [w(F_o^2)^2]} \right\}^{1/2}$$

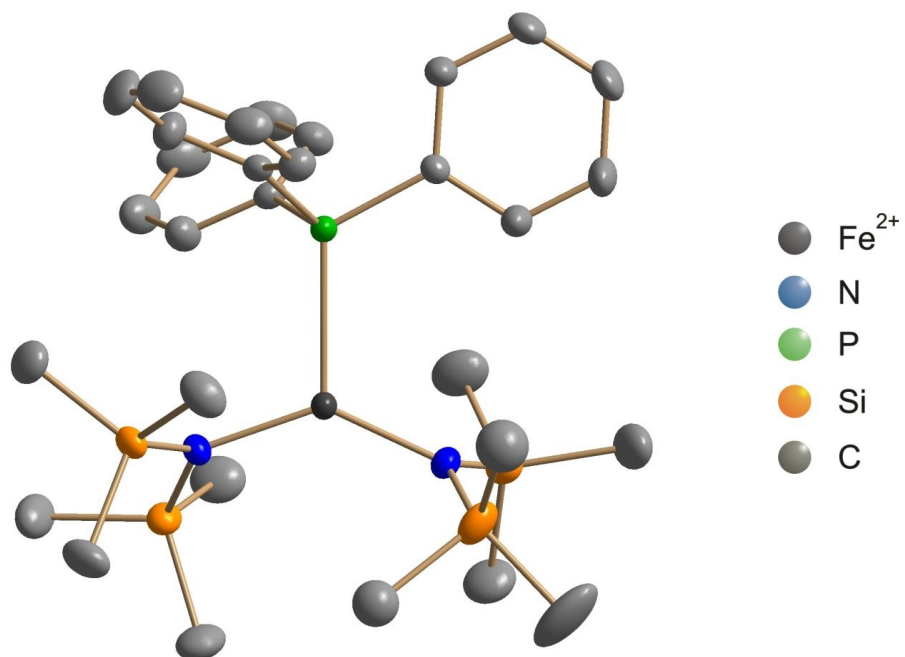

**Figure S1.** Molecular structure of [Fe(N(SiMe<sub>3</sub>)<sub>2</sub>)<sub>2</sub>(PPh<sub>3</sub>)] (**1**) in the crystal (ellipsoids drawn at 50% probability level, H atoms omitted).



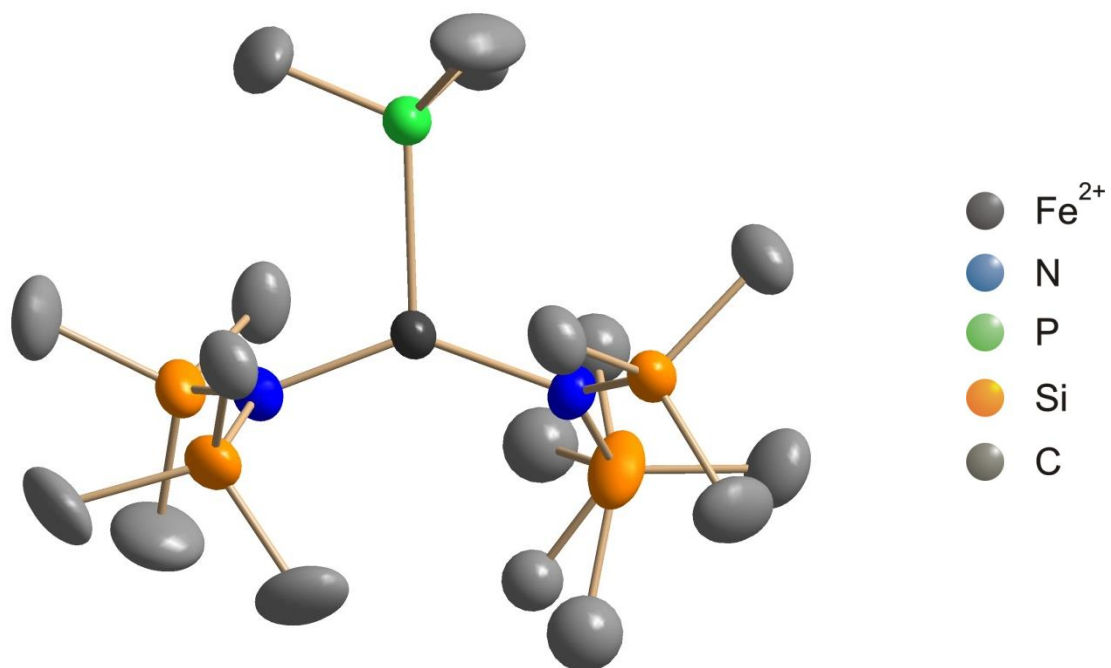

**Figure S2.** Molecular structure of [Fe(N(SiMe<sub>3</sub>)<sub>2</sub>)<sub>2</sub>(PMe<sub>3</sub>)] (**2**) in the crystal (ellipsoids drawn at 50% probability level, H atoms omitted).

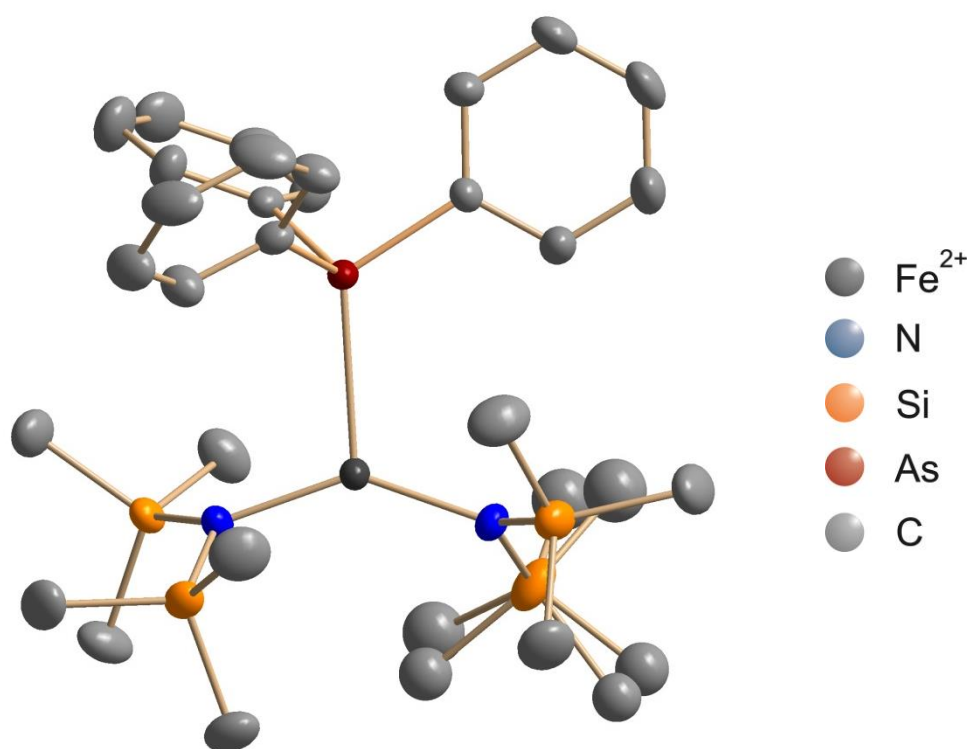

**Figure S3.** Molecular structure of [Fe(N(SiMe<sub>3</sub>)<sub>2</sub>)<sub>2</sub>(AsPh<sub>3</sub>)] (**3**) in the crystal (ellipsoids drawn at 50% probability level, H atoms omitted).

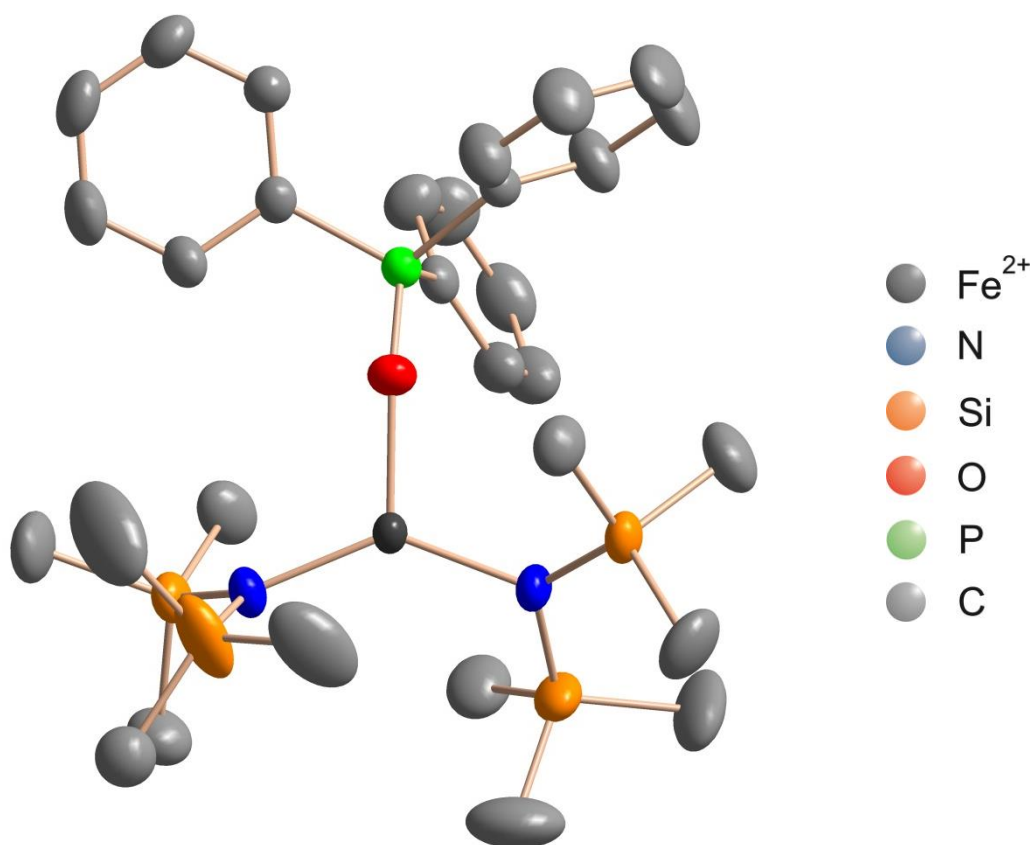

**Figure S4.** Molecular structure of [Fe(N(SiMe<sub>3</sub>)<sub>2</sub>)<sub>2</sub>(OPPh<sub>3</sub>)] (**4**) in the crystal (ellipsoids drawn at 50% probability level, H atoms omitted).

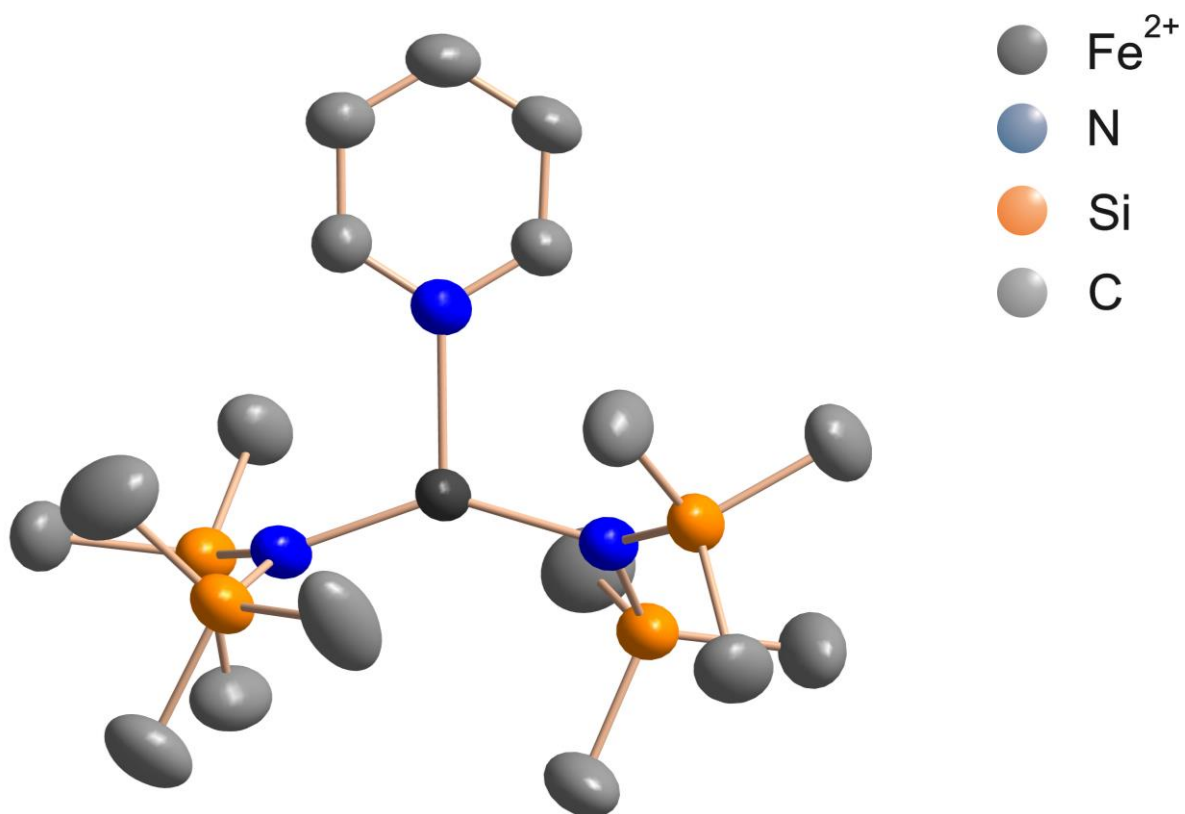

**Figure S5.** Molecular structure of [Fe(N(SiMe<sub>3</sub>)<sub>2</sub>)<sub>2</sub>(py)] **5a** in the crystal structure of **5** (ellipsoids drawn at 50% probability level, H atoms omitted).

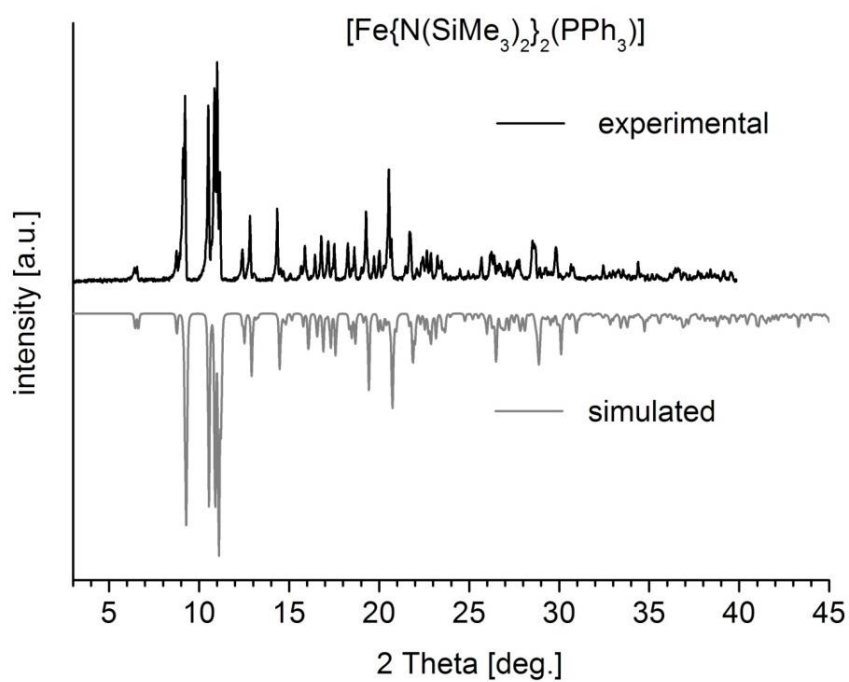

**Figure S6.** Measured (black) and simulated (grey) X-ray powder pattern for  $[\text{Fe}\{\text{N}(\text{SiMe}_3)_2\}_2\text{PPh}_3]$  (**1**).

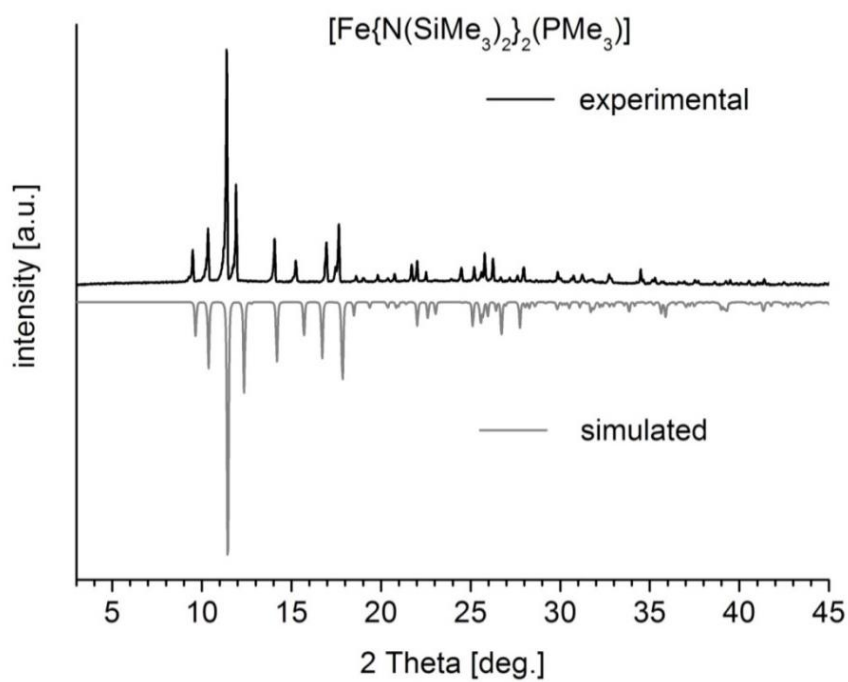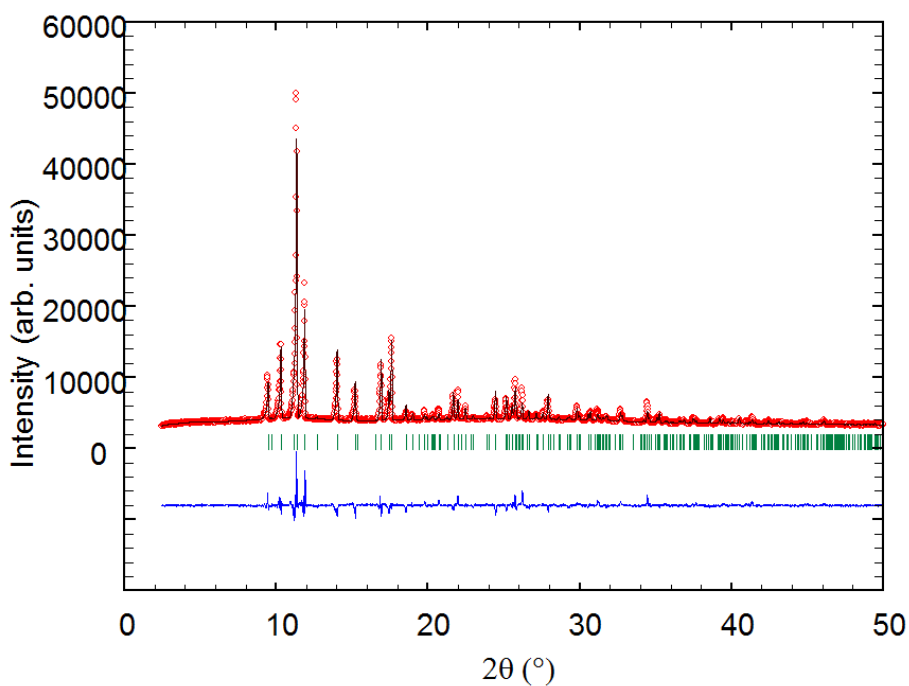

***powder refinement data:***

orthorhombic,  $Pna2_1$

$a = 18.651$ ,  $b = 10.467$ ,  $c = 14.882$  Å

$V = 2905.2$  Å<sup>3</sup>

Bragg  $R$ -factor: 14.6,  $RF$ -factor : 24.6

**Figure S7.** Measured (black) and simulated (grey) X-ray powder pattern for  $[\text{Fe}\{\text{N}(\text{SiMe}_3)_2\}_2\text{PMe}_3]$  (**2**).

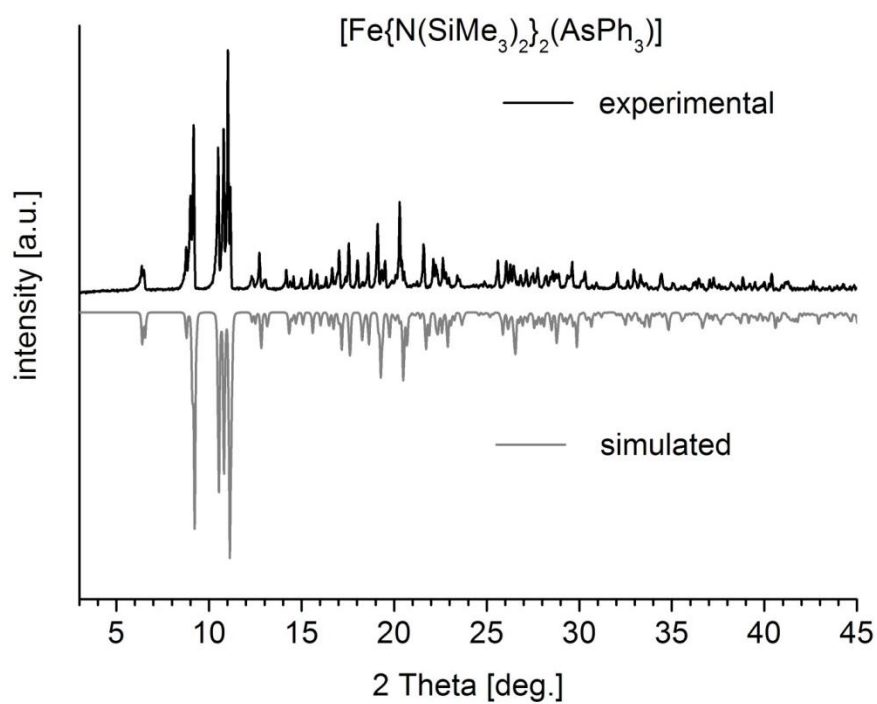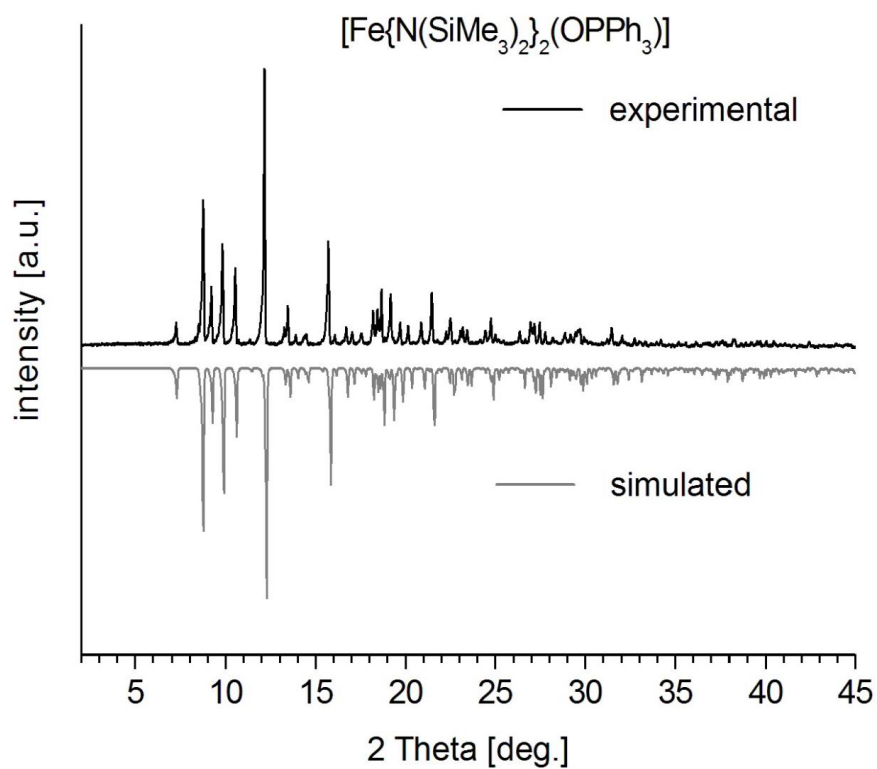

**Figure S8.** Measured (black) and simulated (grey) X-ray powder pattern for  $[\text{Fe}\{\text{N}(\text{SiMe}_3)_2\}_2(\text{AsPh}_3)]$  (**3**) (up) and  $[\text{Fe}\{\text{N}(\text{SiMe}_3)_2\}_2(\text{OPPh}_3)]$  (**4**) (below).

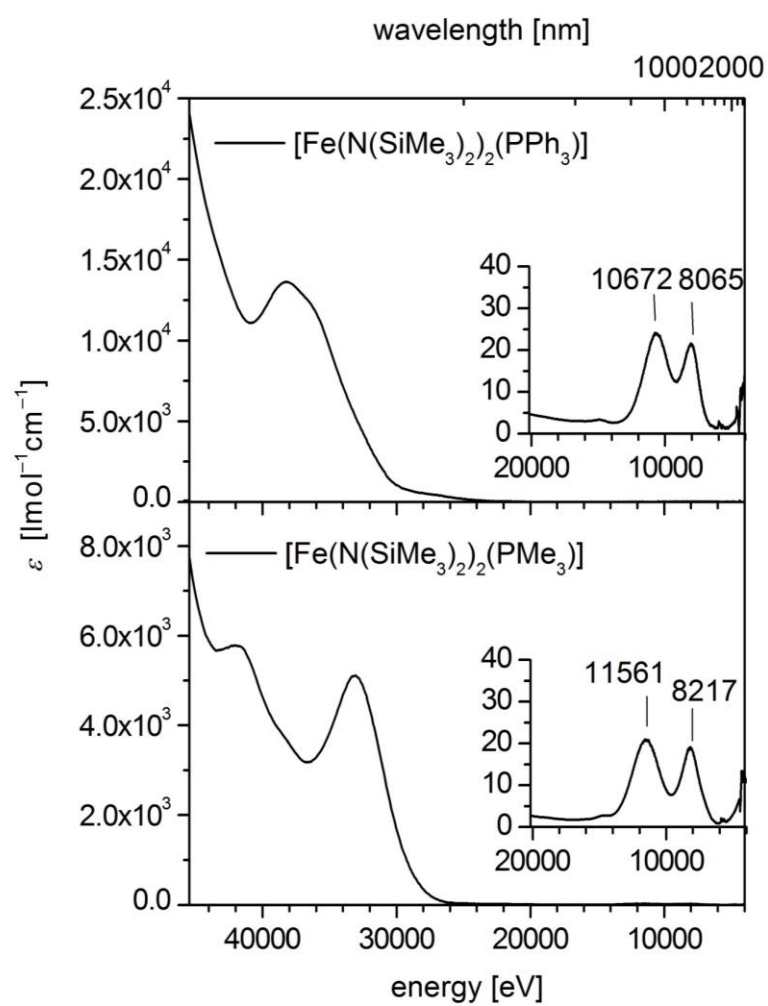

**Figure S9.** Electronic spectra of **1** and **2** in  $\text{C}_6\text{D}_6$ .



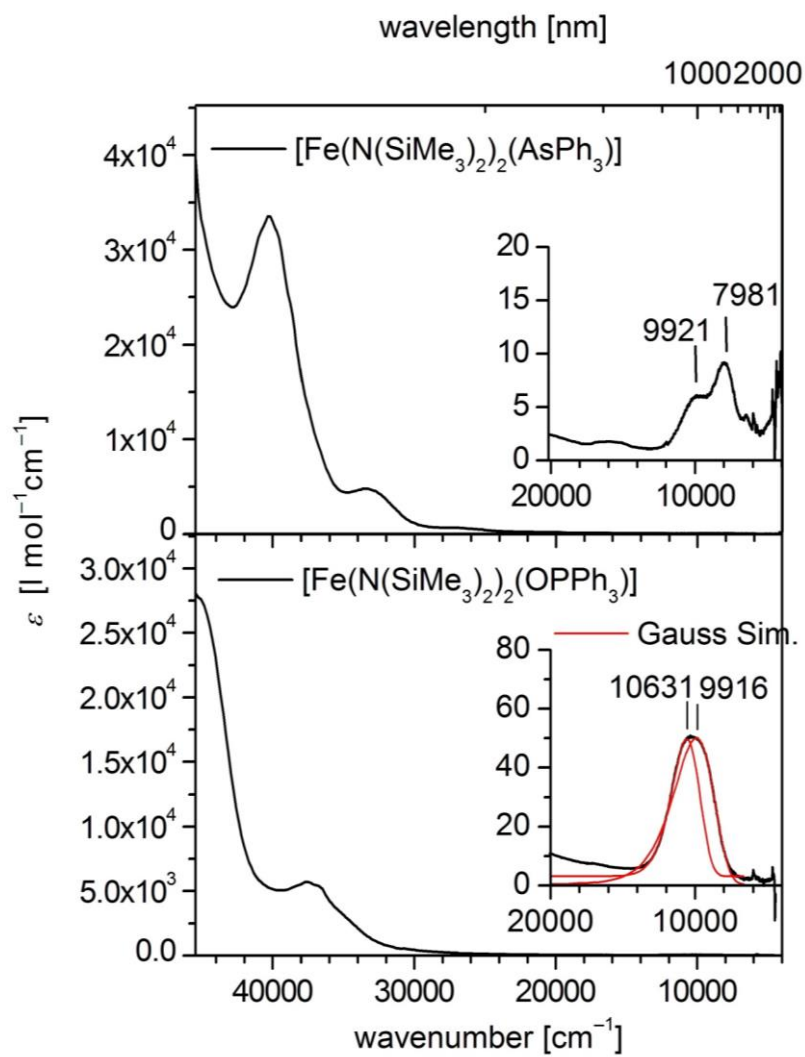

**Figure S10.** Electronic spectra of **3** and **4** in  $\text{C}_6\text{D}_6$ .

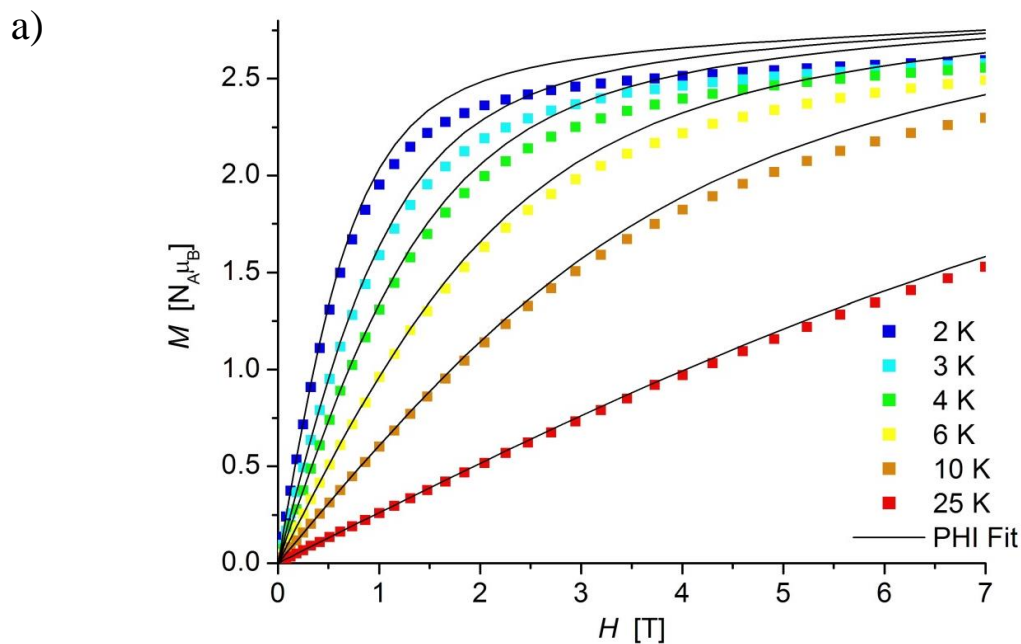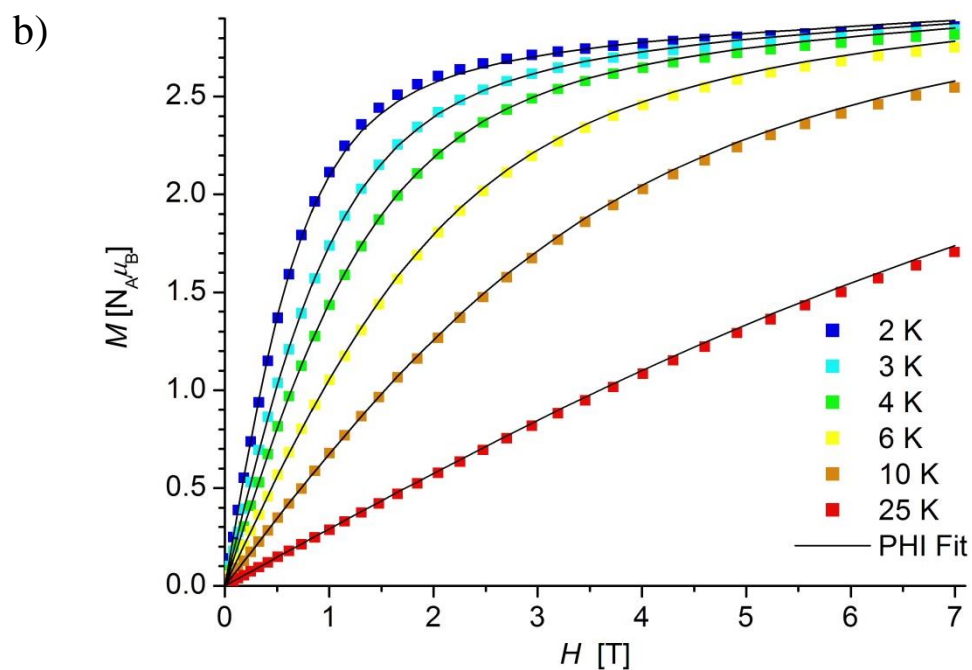

**Figure S11.** Plots of magnetization  $M$  versus  $H$  for a)  $[\text{Fe}\{\text{N}(\text{SiMe}_3)_2\}_2\text{PPh}_3]$  (1) and b)  $[\text{Fe}\{\text{N}(\text{SiMe}_3)_2\}_2\text{PMe}_3]$  (2) measured between 2 and 25 K. The solid lines represent the calculated curves (eqn (S1)) with the PHI program<sup>1</sup> (Table 2).

a)

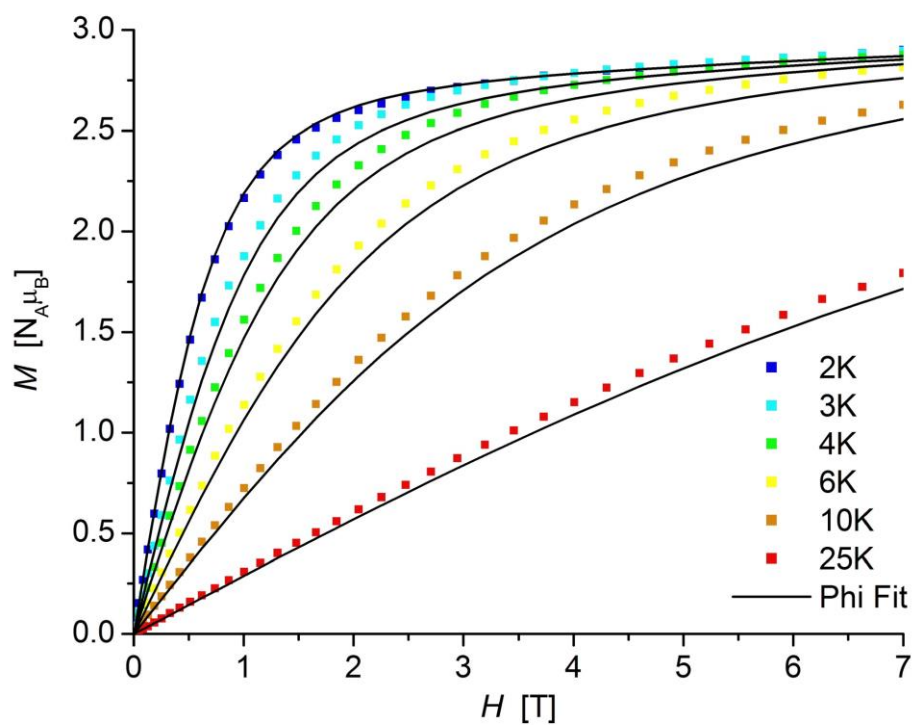

b)

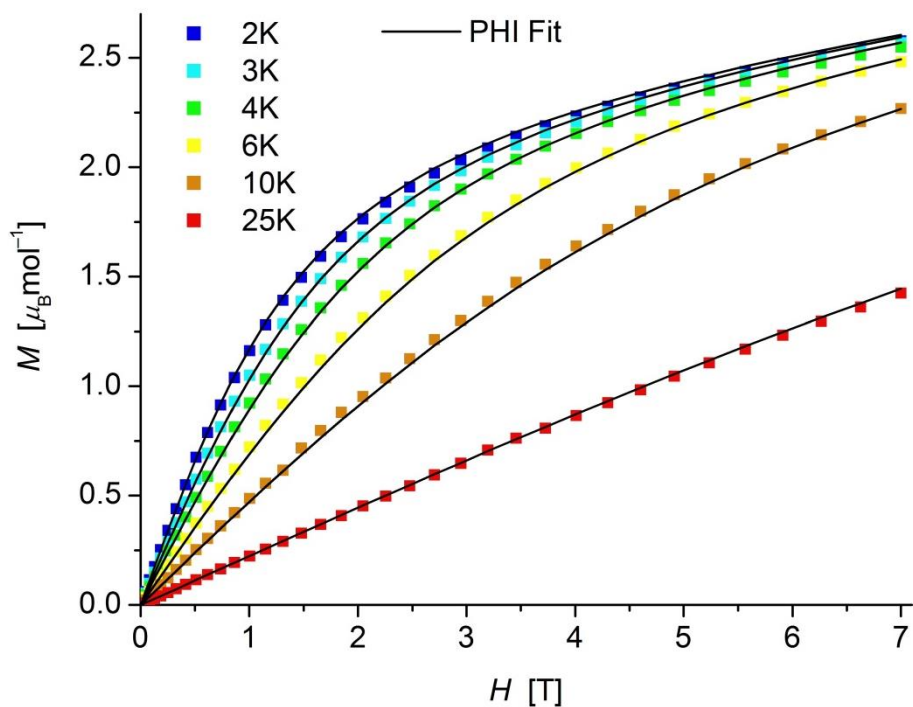

**Figure S12.** Plots of magnetization  $M$  versus  $H$  for a)  $[\text{Fe}\{\text{N}(\text{SiMe}_3)_2\}_2\text{AsPh}_3]$  (**3**) and b)  $[\text{Fe}\{\text{N}(\text{SiMe}_3)_2\}_2\text{OPPh}_3]$  (**4**) measured between 2 and 25 K. The solid lines represent the calculated curves (eqn (S1)) with the PHI program<sup>1</sup> (Table 2).

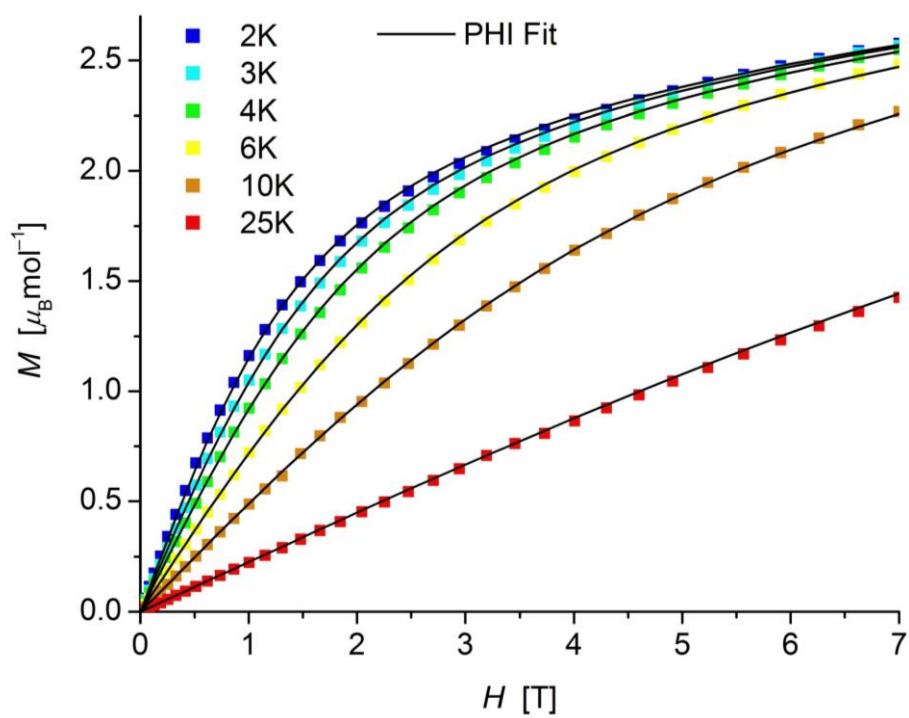

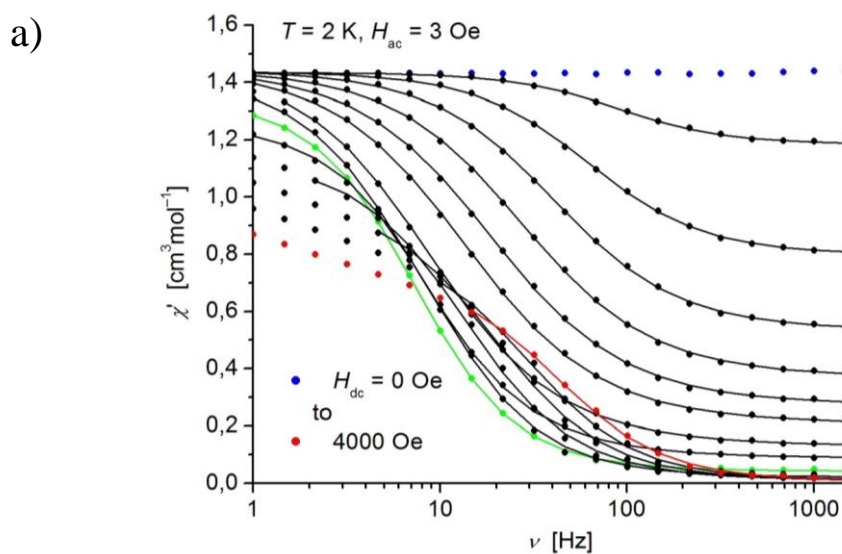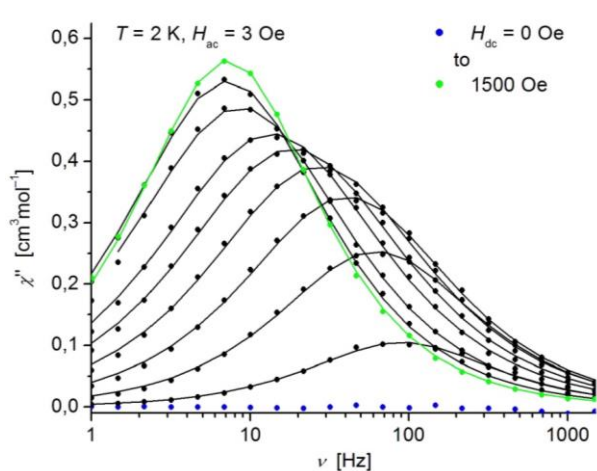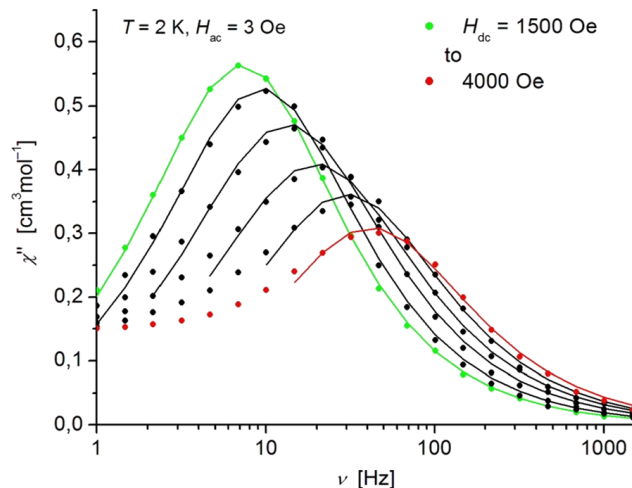

**Figure S13.** Frequency dependence of the in-phase  $\chi'$  (a) and out-of-phase  $\chi''$  (b) component of the ac magnetic susceptibility at 2K under different dc fields for  $[\text{Fe}(\text{N}(\text{SiMe}_3)_2)_2(\text{PPh}_3)]$  (**1**) (solid lines correspond to the fits to a distribution of single relaxation processes (eqns (S2) and (S3), SI)).

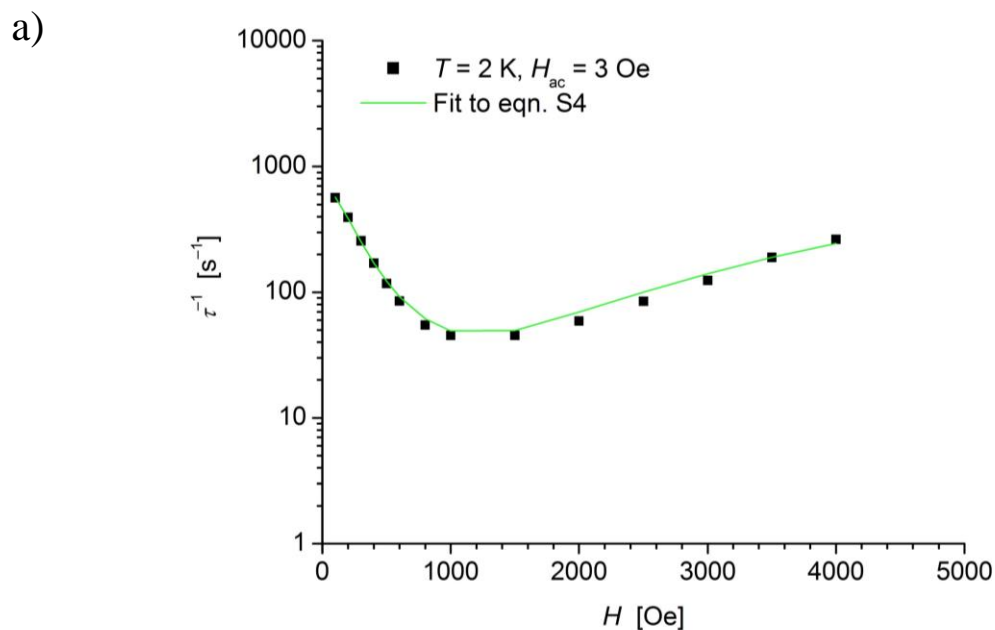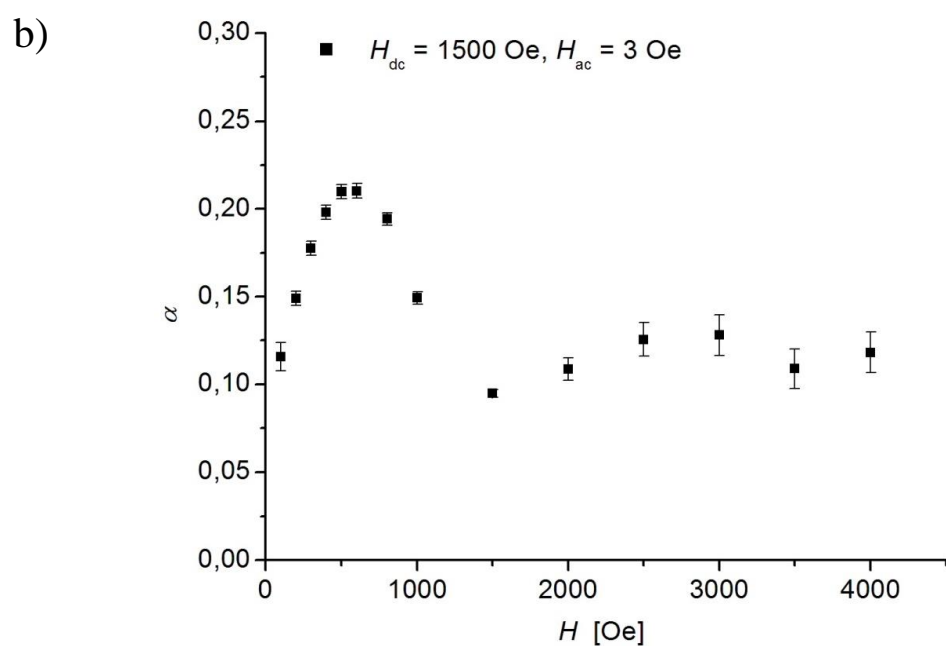

**Figure S14.** a) Field dependence of the inverse relaxation time  $\tau^{-1}$  at  $T = 2 \text{ K}$  for  $[\text{Fe}(\text{N}(\text{SiMe}_3)_2)_2(\text{PPh}_3)]$  (**1**). The green line corresponds to the fit according to eqn (S4). Respective parameters are listed in Table S2 b) Field dependence of the distribution coefficient  $\alpha$  at  $T = 2 \text{ K}$  extracted from the fits are shown in Figure S13.

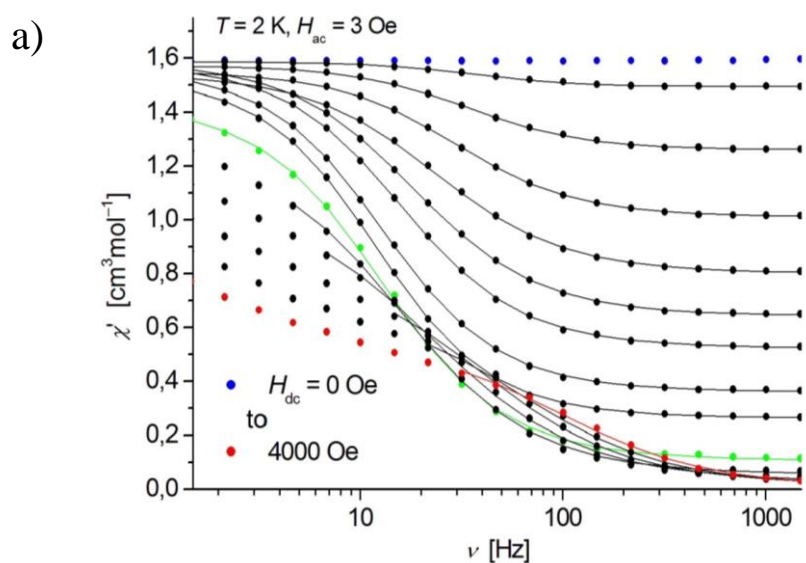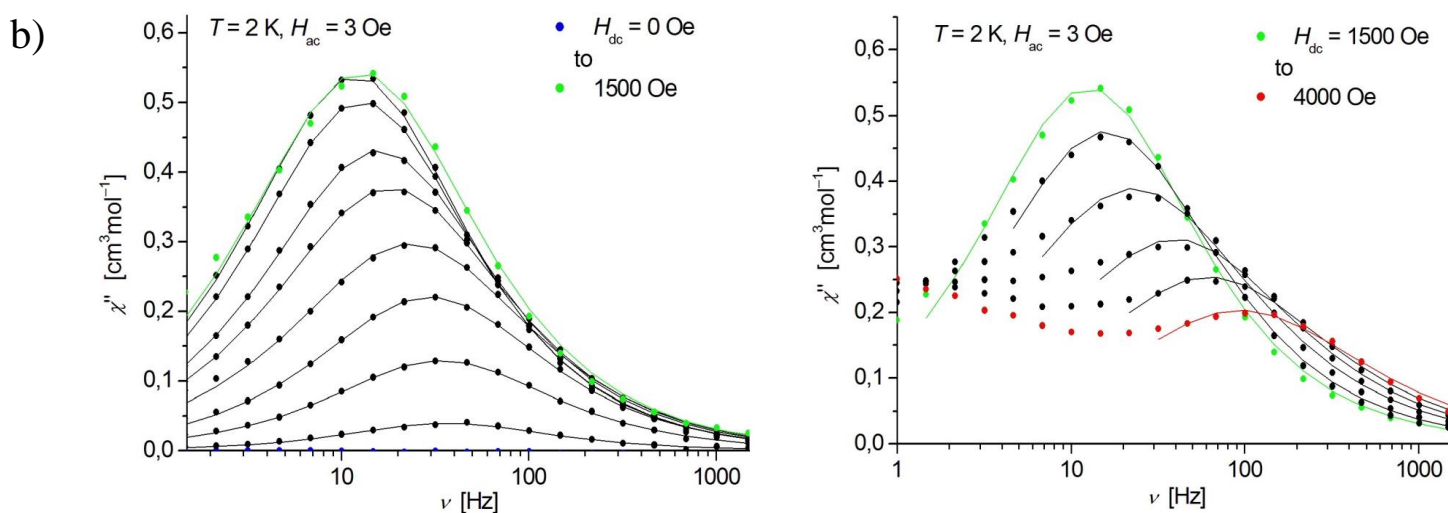

**Figure S15.** Frequency dependence of the in-phase  $\chi'$  (a) and out-of-phase  $\chi''$  (b) component of the ac magnetic susceptibility at 2K under different dc fields for  $[\text{Fe}(\text{N}(\text{SiMe}_3)_2)_2(\text{PMe}_3)]$  (**2**) (solid lines correspond to the fits to a distribution of single relaxation processes (eqns (S2) and (S3), SI)).

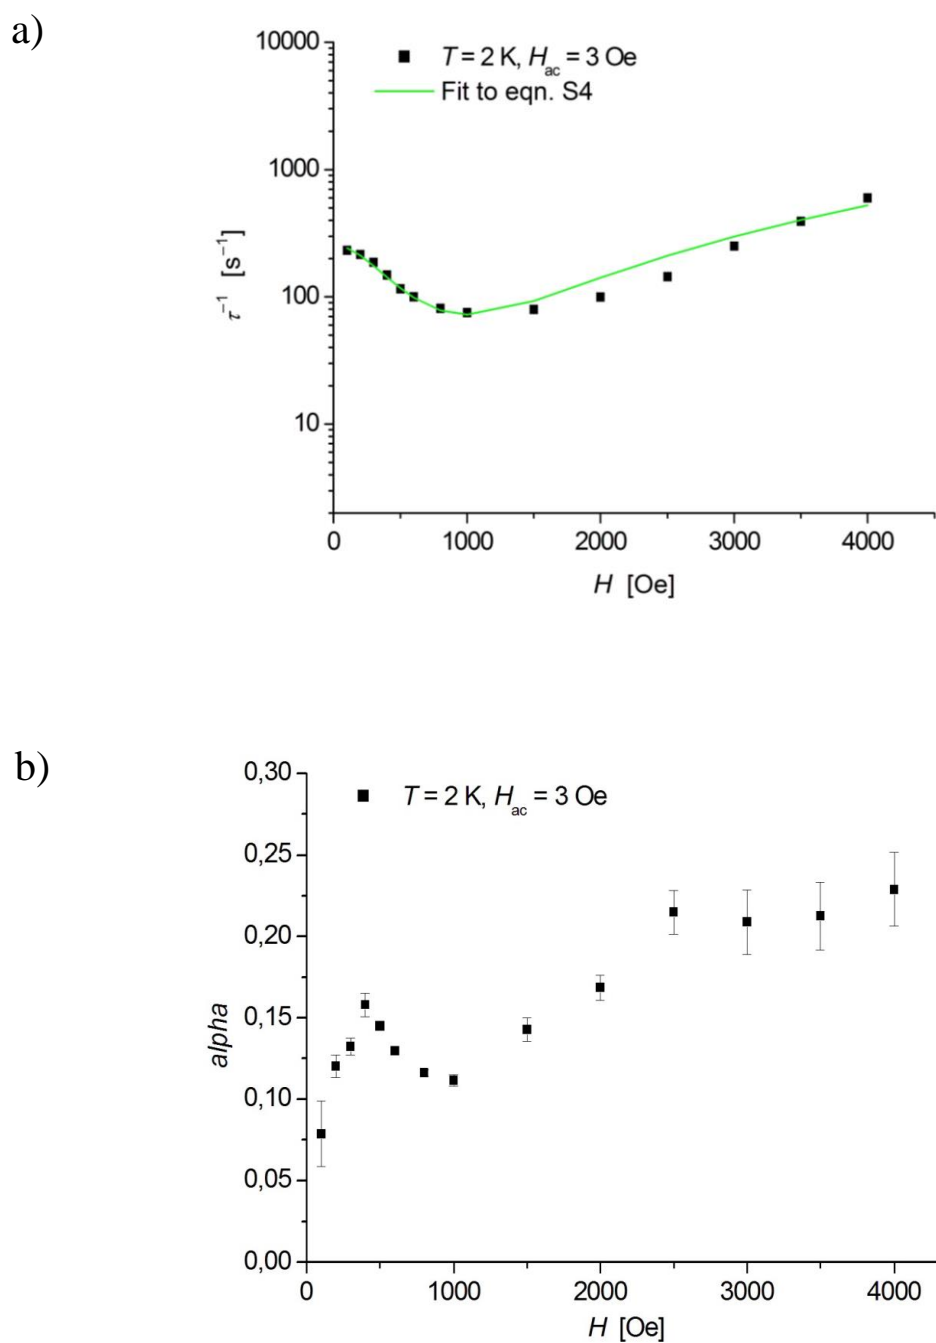

**Figure S16.** a) Field dependence of the inverse relaxation time  $\tau^{-1}$  at  $T = 2 \text{ K}$  for  $[\text{Fe}(\text{N}(\text{SiMe}_3)_2)_2(\text{PMe}_3)]$  (**2**). The green line corresponds to the fit according to eqn (S4). Respective parameters are listed in Table S2 b) Field dependence of the distribution coefficient  $\alpha$  at  $T = 2 \text{ K}$  extracted from the fits shown in Figure S15.



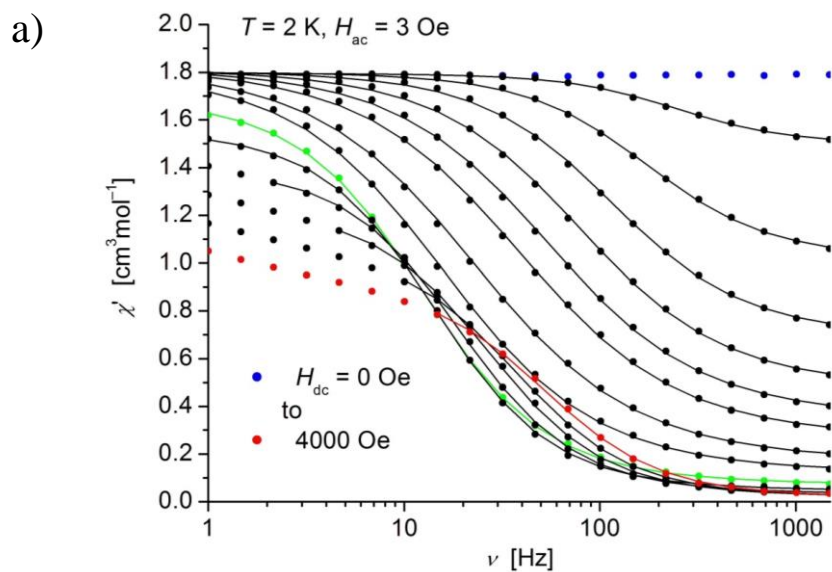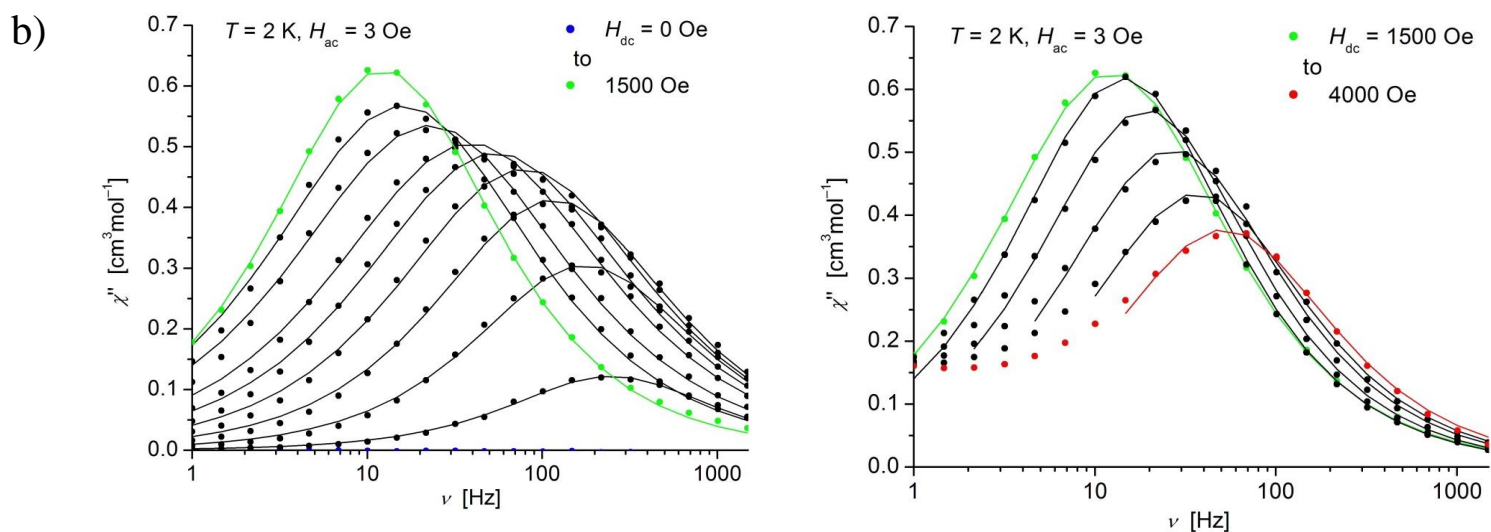

**Figure S17.** Frequency dependence of the in-phase  $\chi'$  (a) and out-of-phase  $\chi''$  (b) component of the ac magnetic susceptibility at 2K under different dc fields for  $[\text{Fe}(\text{N}(\text{SiMe}_3)_2)_2(\text{AsPh}_3)]$  (**3**) (solid lines correspond to the fits to a distribution of single relaxation processes (eqns (S2) and (S3)).

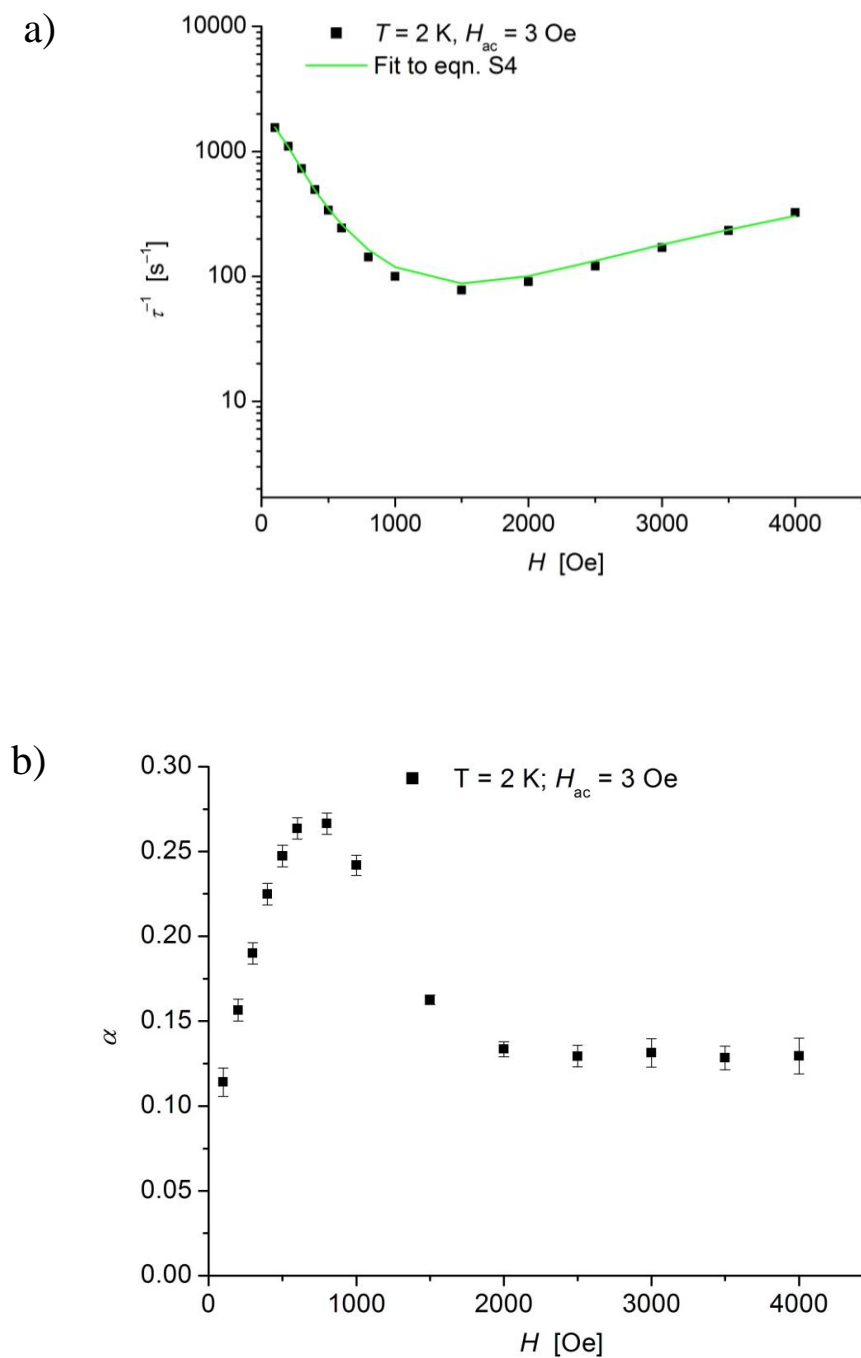

**Figure S18.** a) Field dependence of the inverse relaxation time  $\tau^{-1}$  at  $T = 2 \text{ K}$  for  $[\text{Fe}(\text{N}(\text{SiMe}_3)_2)_2(\text{AsPh}_3)]$  (**3**). The green line corresponds to the fit according to eqn (S4). Respective parameters are listed in Table S2 b) Field dependence of the distribution coefficient  $\alpha$  at  $T = 2 \text{ K}$  extracted from the fits shown in Figure S17.

**Table S2** Results of the fittings of the field dependent ac magnetic data of **1–3**<sup>a</sup>

|          | $A [s^{-1}Oe^{-2}]$    | $B_1 [s^{-1}]$ | $B_2 [Oe^{-2}]$         |
|----------|------------------------|----------------|-------------------------|
| <b>1</b> | $2.0(1) \cdot 10^{-5}$ | 677(17)        | $2.0(1) \cdot 10^{-5}$  |
| <b>2</b> | $3.0(2) \cdot 10^{-5}$ | 255(35)        | $5.4(22) \cdot 10^{-6}$ |
| <b>3</b> | $2.0(1) \cdot 10^{-5}$ | 1836(22)       | $2.0(1) \cdot 10^{-5}$  |

<sup>a</sup> According to eqn (S4) (Figure S14a, S16a and S18a)

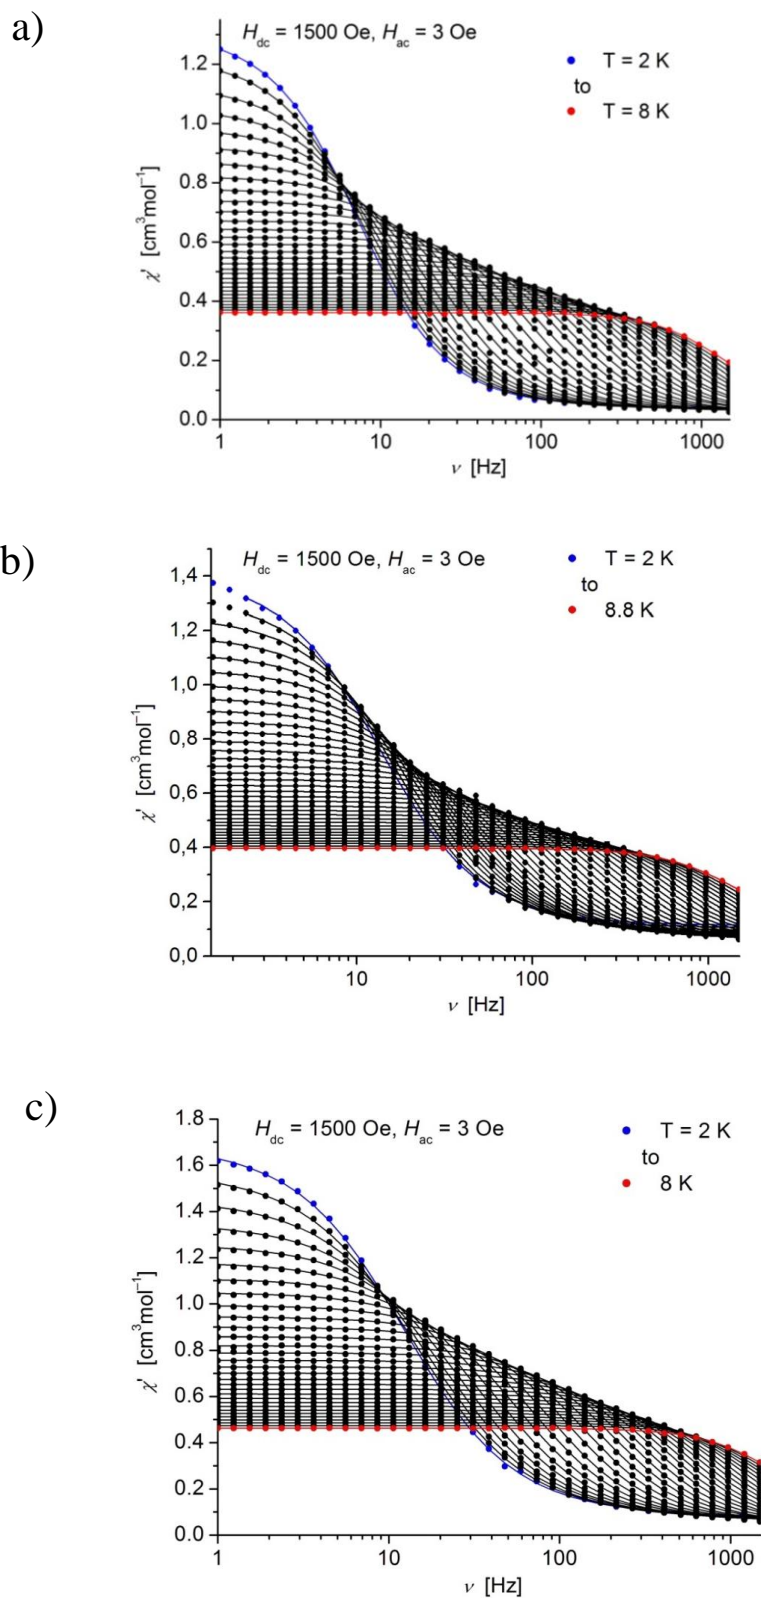

**Figure S19.** Frequency dependence of the in-phase  $\chi'$  component of the ac magnetic susceptibility at 1500 Oe at different temperatures for **1–3** (a–c). Solid lines represent the fits according to eqn (S2) and (S3).

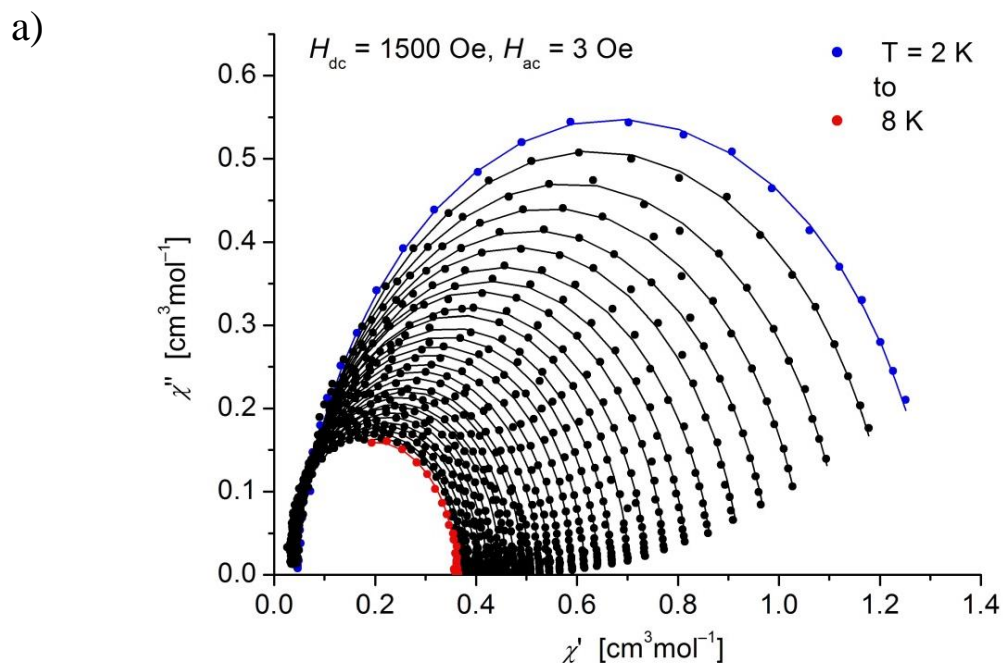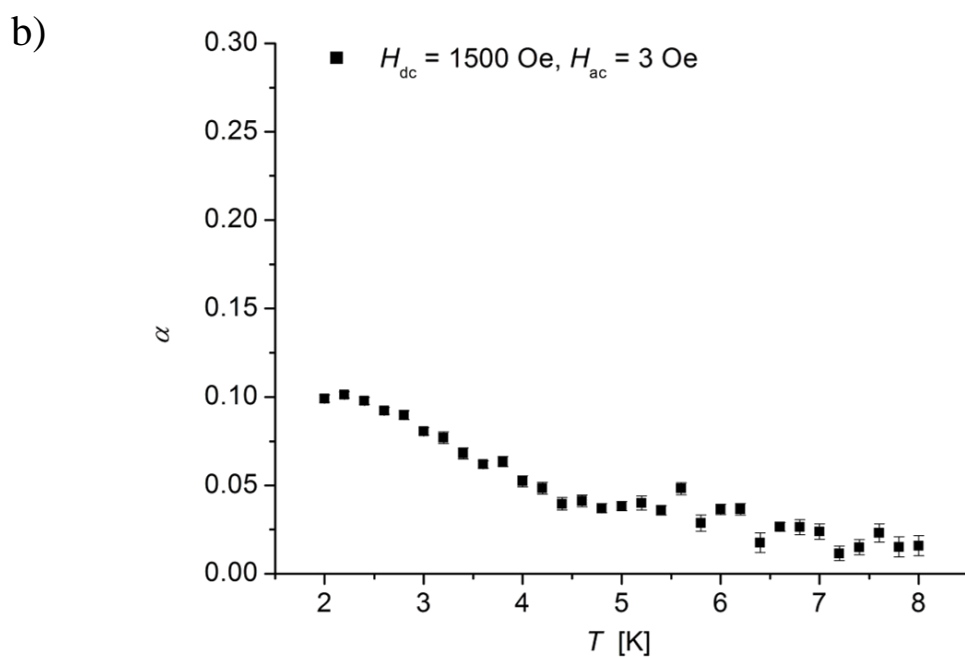

**Figure S20.** a) Cole-Cole plots for  $\chi''$  vs  $\chi'$  of  $[\text{Fe}\{\text{N}(\text{SiMe}_3)_2\}_2\text{PPh}_3]$  (**1**) at different temperatures. The solid lines correspond to the fits obtained with a Debye model (eqn (S2) and (S3)) from which also the distribution coefficients  $\alpha$  (plotted in b)) for the relaxation processes were determined.

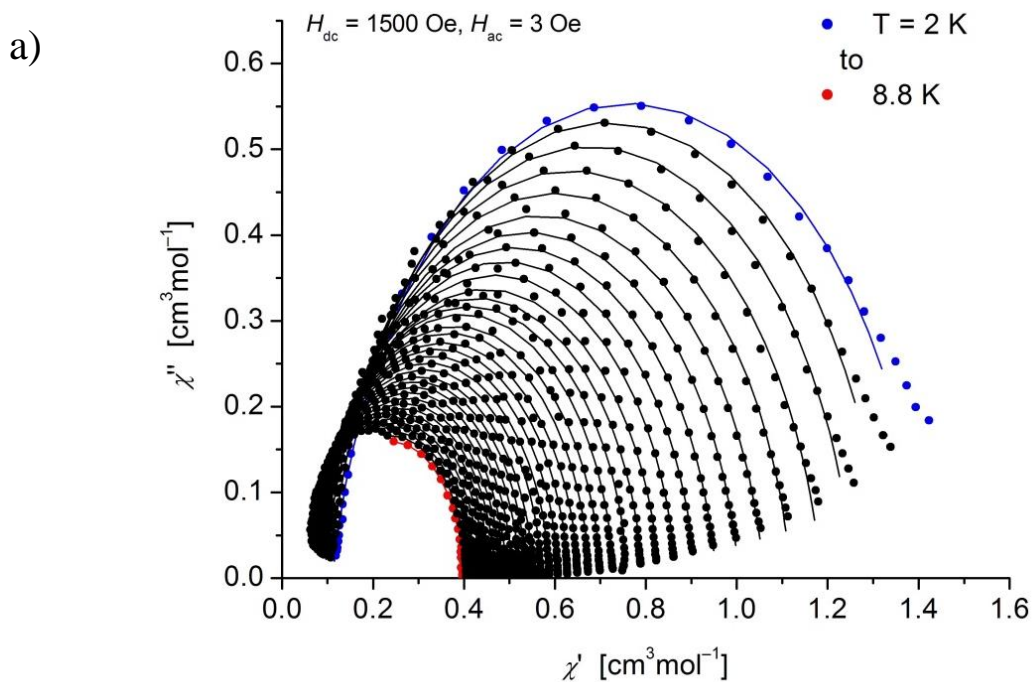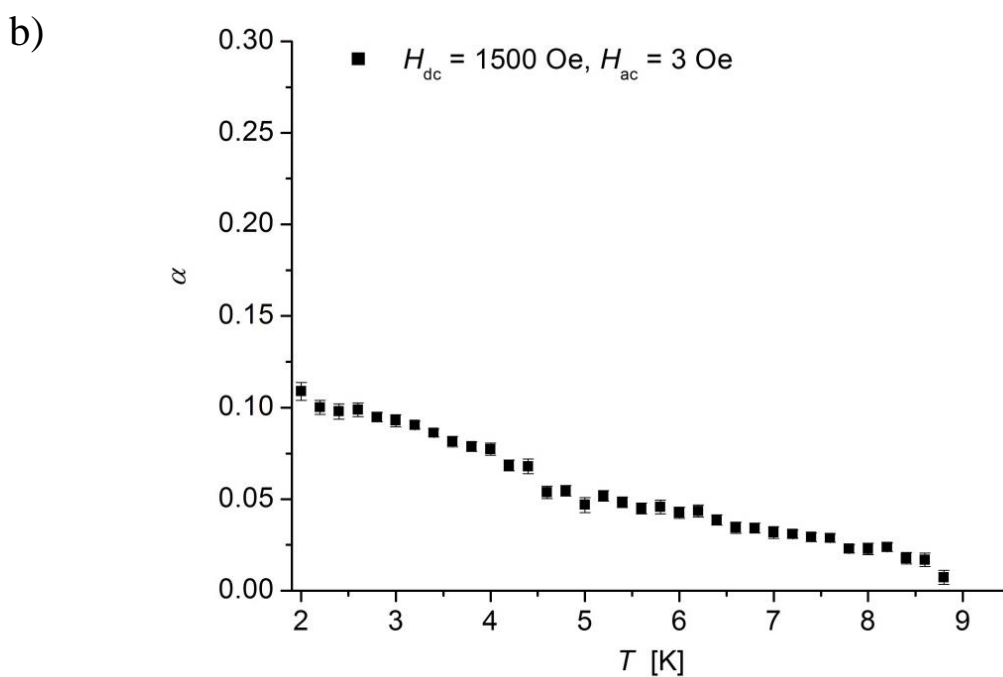

**Figure S21.** a) Cole-Cole plots for  $\chi''$  vs  $\chi'$  of  $[\text{Fe}\{\text{N}(\text{SiMe}_3)_2\}_2\text{PMe}_3]$  (**2**) at different temperatures. The solid lines correspond to the fits obtained with a Debye model (eqn (S2) and (S3)) from which also the distribution coefficients  $\alpha$  (plotted in b)) for the relaxation processes were determined.

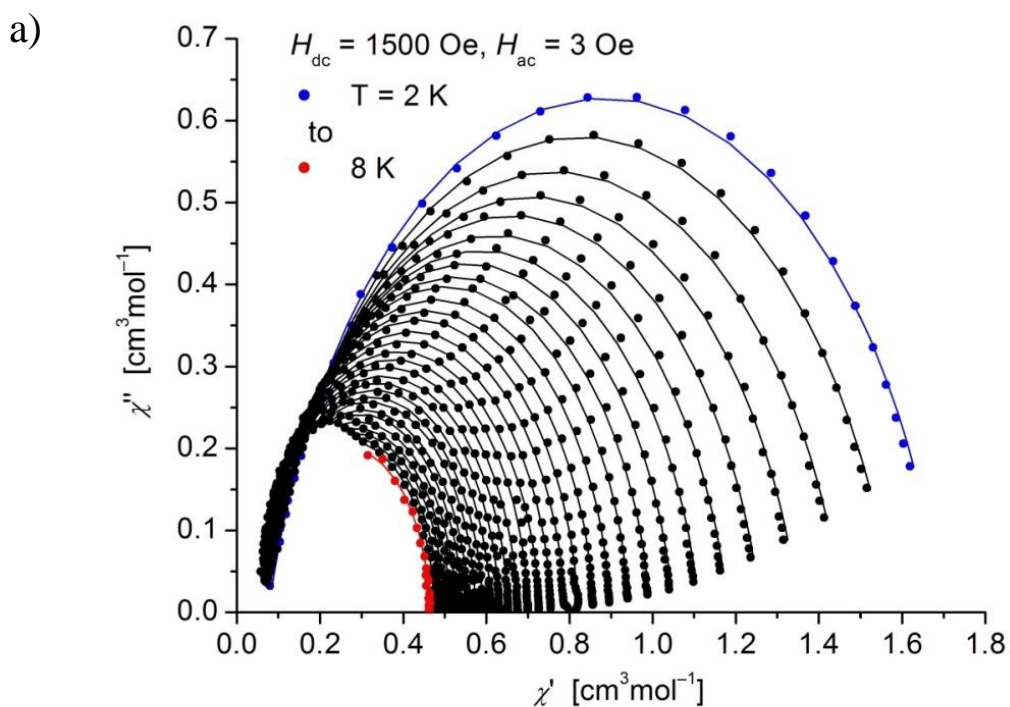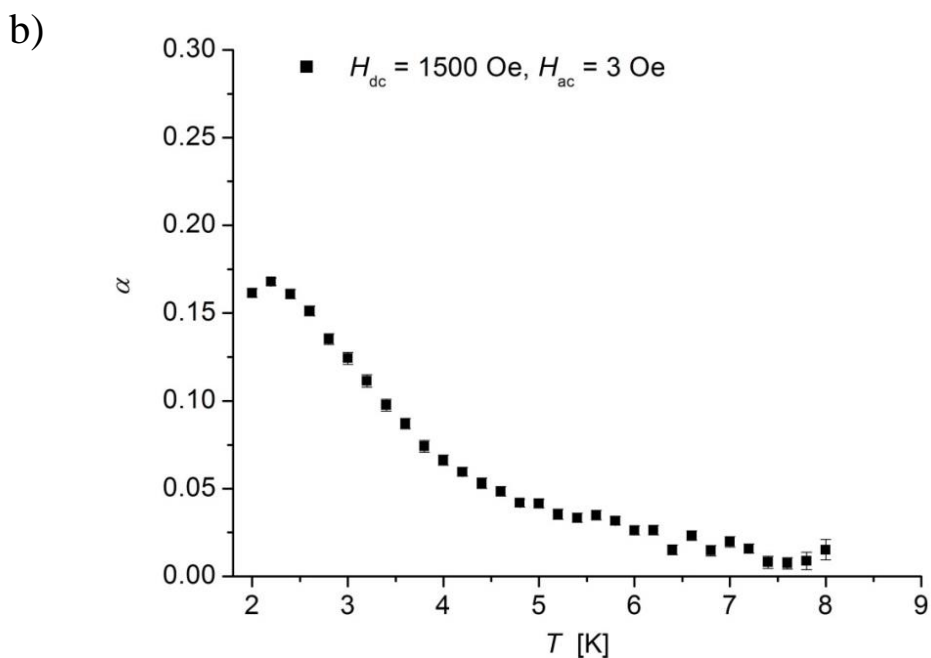

**Figure S22.** a) Cole-Cole plots for  $\chi''$  vs  $\chi'$  of  $[\text{Fe}\{\text{N}(\text{SiMe}_3)_2\}_2\text{AsPh}_3]$  (**3**) at different temperatures. The solid lines correspond to the fits obtained with a Debye model (eqn (S2) and (S3)) from which also the distribution coefficients  $\alpha$  (plotted in b)) for the relaxation processes were determined.

**Table S3** Spin-Free energies (in  $\text{cm}^{-1}$ ) of the lowest five quintet states of complexes **1–7** from ab initio calculations using different active spaces and comparison with the experimental values

|                       | CAS(6,5) |         |         | CAS(12,13)      |       |                      |                       |                      | experiment |                      |
|-----------------------|----------|---------|---------|-----------------|-------|----------------------|-----------------------|----------------------|------------|----------------------|
|                       | SCF      | PT2(ss) | PT2(ms) | CI <sup>a</sup> | SCF   | PT2(ss) <sup>b</sup> | PT2 (ms) <sup>b</sup> | PT2(ss) <sup>c</sup> |            | PT2(ms) <sup>c</sup> |
| <b>1</b>              | 0        | 0       | 0       | 0               | 0     | 0                    | 0                     | 30                   | 266        |                      |
|                       | 311      | 146     | 201     | 916             | 540   | 580                  | 564                   | 0                    | 0          |                      |
|                       | 3329     | 3723    | 3758    | 3900            | 3218  | 3887                 | 3890                  | 3691                 | 3816       |                      |
|                       | 7679     | 7989    | 8024    | 9402            | 8316  | 9018                 | 9042                  | 7970                 | 8094       | 8065                 |
|                       | 10015    | 10436   | 10486   | 11803           | 10978 | 11358                | 11379                 | 10599                | 10740      | 10672                |
| <b>2</b>              | 0        | 0       | 0       | 0               | 0     | 0                    | 0                     | 0                    | 0          |                      |
|                       | 413      | 243     | 232     | 433             | 192   | 264                  | 271                   | 335                  | 344        |                      |
|                       | 3527     | 3953    | 3953    | 3549            | 4046  | 3844                 | 3865                  | 4045                 | 4052       |                      |
|                       | 7775     | 8140    | 8141    | 7797            | 8420  | 7977                 | 7977                  | 9014                 | 8995       | 8217                 |
|                       | 10923    | 11357   | 11370   | 10944           | 11446 | 11307                | 11355                 | 12515                | 12547      | 11561                |
| <b>3</b>              | 0        | 0       | 0       | 0               | 0     | 27                   | 262                   | 18                   | 253        |                      |
|                       | 392      | 194     | 180     | 617             | 176   | 0                    | 0                     | 0                    | 0          |                      |
|                       | 3757     | 4426    | 4234    | 4586            | 3725  | 4063                 | 4182                  | 4062                 | 4181       |                      |
|                       | 7749     | 8102    | 8109    | 8878            | 7692  | 7945                 | 8060                  | 7946                 | 8061       | 7981                 |
|                       | 9783     | 9913    | 9958    | 12105           | 10357 | 9736                 | 9875                  | 9735                 | 9873       | 9921                 |
| <b>4</b>              | 0        | 0       | 0       | 0               | 0     |                      |                       | 0                    | 0          |                      |
|                       | 858      | 1332    | 1342    | 1021            | 2133  |                      |                       | 1668                 | 1673       |                      |
|                       | 2801     | 3437    | 3448    | 3161            | 3519  |                      |                       | 3401                 | 3403       |                      |
|                       | 8422     | 9233    | 9244    | 8540            | 9414  |                      |                       | 9759                 | 9670       | 9916                 |
|                       | 10283    | 11035   | 11057   | 11240           | 11767 |                      |                       | 11167                | 11273      | 10631                |
| <b>5a<sup>d</sup></b> |          |         |         |                 | 0     |                      |                       | 0                    | 0          |                      |
|                       |          |         |         |                 | 1123  |                      |                       | 651                  | 661        |                      |
|                       |          |         |         |                 | 3468  |                      |                       | 3563                 | 3574       |                      |
|                       |          |         |         |                 | 8253  |                      |                       | 8400                 | 8368       |                      |
|                       |          |         |         |                 | 12244 |                      |                       | 11315                | 11377      |                      |
| <b>5b<sup>d</sup></b> |          |         |         |                 | 0     |                      |                       | 0                    | 0          |                      |
|                       |          |         |         |                 | 1186  |                      |                       | 749                  | 758        |                      |
|                       |          |         |         |                 | 3316  |                      |                       | 3400                 | 3410       |                      |
|                       |          |         |         |                 | 8779  |                      |                       | 8987                 | 8971       |                      |
|                       |          |         |         |                 | 12428 |                      |                       | 11563                | 11607      |                      |
| <b>6<sup>d</sup></b>  |          |         |         |                 | 0     |                      |                       | 0                    | 0          |                      |
|                       |          |         |         |                 | 1395  |                      |                       | 887                  | 897        |                      |
|                       |          |         |         |                 | 3657  |                      |                       | 3613                 | 3622       |                      |
|                       |          |         |         |                 | 8801  |                      |                       | 9214                 | 9224       | 8631                 |
|                       |          |         |         |                 | 11346 |                      |                       | 10527                | 10549      | 10083                |
| <b>7<sup>e</sup></b>  | 0        | 0       | 0       | 0               | 0     | 0                    | 234                   | 0                    | 309        |                      |
|                       | 298      | 172     | 171     | 422             | 187   | 27                   | 0                     | 33                   | 0          |                      |
|                       | 2993     | 3390    | 3394    | 3468            | 3166  | 3383                 | 3487                  | 3249                 | 3386       |                      |
|                       | 7634     | 7861    | 7866    | 9279            | 7529  | 7773                 | 7877                  | 8433                 | 8576       | 8308                 |
|                       | 9818     | 10463   | 10476   | 11466           | 10785 | 10302                | 10410                 | 10592                | 10735      | 10728                |



- <sup>a</sup> Based orbitals of the CAS(6,5)SCF calculation which were localized such that the doubly occupied ligand lone pairs pointing towards the iron center, as well as the double d-shell are in the active space.
- <sup>b</sup> Number of localized, inactive orbitals in the vicinity of Fe, N, O, P kept (using Mulliken charge threshold of 0.10): 3 (**1**), 6 (**2**), 7 (**3**), 8 (**4**), 6 (**5**), 7 (**6**), 7 (**7**).
- <sup>c</sup> Number of localized, inactive orbitals in the vicinity of Fe, N, O, P kept (using Mulliken charge threshold of 0.01 (0.00 for **3**)): 8 (**1**), 25 (**2**), 81 (**3**), 22 (**4**), 27 (**5**).
- <sup>d</sup> Given the similarity of the results for **1–5**, only the CAS(12,13) based results with a Mulliken charge threshold of 0.01 for the PT2 calculations are shown.
- <sup>e</sup> The root-flipping encountered going from PT2(SS) to PT2(MS) is difficult to access given the complexity of the multi-state, multi-reference perturbation theory. Note, however, that spin orbit coupling largely overcompensates this effect (Table S4).

**Table S4** Spin-orbit coupled RASSI energies ( $\text{cm}^{-1}$ ) of the lowest 11 states of complexes **1–7** based on CAS(12,13)SCF wave functions with and without CASPT2 energy corrections to the spin-orbit configuration interaction matrix

| (12,13) | <b>1</b> |       |       | <b>2</b> |       |       | <b>3</b> |       |       | <b>4</b> |       |       |
|---------|----------|-------|-------|----------|-------|-------|----------|-------|-------|----------|-------|-------|
|         | CAS      | SSPT2 | MSPT2 |
| 1       | 0        | 0     | 0     | 0        | 0     | 0     | 0        | 0     | 0     | 0        | 0     | 0     |
| 2       | 0        | 0     | 0     | 0        | 0     | 0     | 0        | 0     | 0     | 5        | 4     | 4     |
| 3       | 154      | 137   | 136   | 99       | 166   | 146   | 158      | 172   | 152   | 20       | 27    | 27    |
| 4       | 158      | 141   | 140   | 116      | 168   | 151   | 164      | 173   | 157   | 46       | 53    | 53    |
| 5       | 255      | 210   | 208   | 153      | 324   | 232   | 264      | 337   | 243   | 47       | 57    | 56    |
| 6       | 436      | 533   | 539   | 701      | 344   | 486   | 444      | 352   | 490   | 2172     | 1724  | 1728  |
| 7       | 521      | 589   | 594   | 738      | 487   | 554   | 535      | 504   | 565   | 2176     | 1732  | 1736  |
| 8       | 553      | 622   | 627   | 757      | 518   | 588   | 560      | 530   | 593   | 2196     | 1748  | 1752  |
| 9       | 694      | 747   | 750   | 859      | 671   | 722   | 710      | 689   | 734   | 2221     | 1782  | 1786  |
| 10      | 695      | 748   | 751   | 859      | 672   | 723   | 710      | 689   | 735   | 2224     | 1784  | 1788  |
| 11      | 4305     | 4260  | 4264  | 3393     | 4021  | 4053  | 4001     | 4405  | 4429  | 3587     | 3480  | 3482  |

| (12,13) | <b>5a</b> |       |       | <b>5b</b> |       |       | <b>6</b> |       |       | <b>7</b> |       |       |
|---------|-----------|-------|-------|-----------|-------|-------|----------|-------|-------|----------|-------|-------|
|         | CAS       | SSPT2 | MSPT2 | CAS       | SSPT2 | MSPT2 | CAS      | SSPT2 | MSPT2 | CAS      | SSPT2 | MSPT2 |
| 1       | 0         | 0     | 0     | 0         | 0     | 0     | 0        | 0     | 0     | 0        | 0     | 0     |
| 2       | 2         | 1     | 1     | 3         | 1     | 1     | 3        | 2     | 2     | 0        | 0     | 0     |
| 3       | 48        | 82    | 81    | 44        | 72    | 71    | 37       | 61    | 61    | 153      | 169   | 142   |
| 4       | 72        | 102   | 101   | 69        | 93    | 93    | 61       | 83    | 83    | 160      | 170   | 148   |
| 5       | 83        | 129   | 127   | 79        | 115   | 114   | 68       | 100   | 99    | 255      | 320   | 222   |
| 6       | 1211      | 788   | 797   | 1269      | 873   | 881   | 1467     | 994   | 1004  | 447      | 360   | 523   |
| 7       | 1227      | 818   | 827   | 1284      | 898   | 906   | 1479     | 1016  | 1025  | 533      | 497   | 585   |
| 8       | 1241      | 833   | 841   | 1298      | 913   | 921   | 1491     | 1029  | 1038  | 562      | 529   | 619   |
| 9       | 1296      | 920   | 927   | 1351      | 991   | 998   | 1535     | 1096  | 1104  | 708      | 685   | 750   |
| 10      | 1297      | 920   | 927   | 1352      | 991   | 998   | 1536     | 1096  | 1105  | 709      | 685   | 751   |
| 11      | 3571      | 3712  | 3722  | 3418      | 3538  | 3546  | 3745     | 3733  | 3742  | 3440     | 3589  | 3621  |

**Table S5** RASSI wave function analysis/decomposition of **1 – 7**. Weights of the three most important spin-orbit-free states for the lowest ten spin-orbit states.

**(1)** [Fe(N(SiMe<sub>3</sub>)<sub>2</sub>(PPh<sub>3</sub>))<sub>2</sub>]

| SO State | energy [cm <sup>-1</sup> ] | Spin-free state | Spin | Weights | Spin-free state | Spin | Weights | Spin-free state | Spin | Weights |
|----------|----------------------------|-----------------|------|---------|-----------------|------|---------|-----------------|------|---------|
| CASSCF   |                            |                 |      |         |                 |      |         |                 |      |         |
| 1        | 0                          | 1               | 2.0  | 0.8131  | 2               | 2.0  | 0.1845  | 3               | 2.0  | 0.0011  |
| 2        | 0                          | 1               | 2.0  | 0.8115  | 2               | 2.0  | 0.1864  | 3               | 2.0  | 0.0008  |
| 3        | 154                        | 1               | 2.0  | 0.9268  | 2               | 2.0  | 0.0652  | 3               | 2.0  | 0.0069  |
| 4        | 158                        | 1               | 2.0  | 0.9147  | 2               | 2.0  | 0.0815  | 3               | 2.0  | 0.0029  |
| 5        | 255                        | 1               | 2.0  | 0.9901  | 3               | 2.0  | 0.0064  | 2               | 2.0  | 0.0025  |
| 6        | 436                        | 2               | 2.0  | 0.9938  | 3               | 2.0  | 0.0045  | 4               | 2.0  | 0.0005  |
| 7        | 521                        | 2               | 2.0  | 0.9270  | 1               | 2.0  | 0.0638  | 3               | 2.0  | 0.0079  |
| 8        | 553                        | 2               | 2.0  | 0.9163  | 1               | 2.0  | 0.0816  | 4               | 2.0  | 0.0006  |
| 9        | 694                        | 2               | 2.0  | 0.8097  | 1               | 2.0  | 0.1853  | 3               | 2.0  | 0.0033  |
| 10       | 695                        | 2               | 2.0  | 0.8105  | 1               | 2.0  | 0.1848  | 3               | 2.0  | 0.0030  |
| SSCASPT2 |                            |                 |      |         |                 |      |         |                 |      |         |
| 1        | 0                          | 1               | 2.0  | 0.5229  | 2               | 2.0  | 0.4757  | 7               | 1.0  | 0.0003  |
| 2        | 0                          | 1               | 2.0  | 0.5226  | 2               | 2.0  | 0.4760  | 7               | 1.0  | 0.0003  |
| 3        | 137                        | 1               | 2.0  | 0.5485  | 2               | 2.0  | 0.4480  | 3               | 2.0  | 0.0022  |
| 4        | 141                        | 1               | 2.0  | 0.5173  | 2               | 2.0  | 0.4792  | 3               | 2.0  | 0.0025  |
| 5        | 210                        | 1               | 2.0  | 0.9817  | 2               | 2.0  | 0.0145  | 3               | 2.0  | 0.0025  |
| 6        | 533                        | 2               | 2.0  | 0.9773  | 1               | 2.0  | 0.0165  | 3               | 2.0  | 0.0052  |
| 7        | 589                        | 2               | 2.0  | 0.5146  | 1               | 2.0  | 0.4766  | 3               | 2.0  | 0.0075  |
| 8        | 622                        | 2               | 2.0  | 0.5476  | 1               | 2.0  | 0.4510  | 4               | 2.0  | 0.0004  |
| 9        | 747                        | 2               | 2.0  | 0.5212  | 1               | 2.0  | 0.4747  | 3               | 2.0  | 0.0025  |
| 10       | 748                        | 2               | 2.0  | 0.5231  | 1               | 2.0  | 0.4731  | 3               | 2.0  | 0.0023  |
| MSCASPT2 |                            |                 |      |         |                 |      |         |                 |      |         |
| 1        | 0                          | 1               | 2.0  | 0.6839  | 2               | 2.0  | 0.3146  | 7               | 1.0  | 0.0003  |
| 2        | 0                          | 1               | 2.0  | 0.6839  | 2               | 2.0  | 0.3146  | 7               | 1.0  | 0.0003  |
| 3        | 136                        | 1               | 2.0  | 0.8054  | 2               | 2.0  | 0.1914  | 3               | 2.0  | 0.0018  |
| 4        | 140                        | 1               | 2.0  | 0.8013  | 2               | 2.0  | 0.1959  | 3               | 2.0  | 0.0017  |
| 5        | 208                        | 1               | 2.0  | 0.9963  | 3               | 2.0  | 0.0021  | 4               | 2.0  | 0.0005  |
| 6        | 539                        | 2               | 2.0  | 0.9910  | 3               | 2.0  | 0.0059  | 1               | 2.0  | 0.0020  |
| 7        | 594                        | 2               | 2.0  | 0.7980  | 1               | 2.0  | 0.1923  | 3               | 2.0  | 0.0084  |
| 8        | 627                        | 2               | 2.0  | 0.8035  | 1               | 2.0  | 0.1947  | 3               | 2.0  | 0.0007  |
| 9        | 750                        | 2               | 2.0  | 0.6821  | 1               | 2.0  | 0.3137  | 3               | 2.0  | 0.0027  |
| 10       | 751                        | 2               | 2.0  | 0.6846  | 1               | 2.0  | 0.3117  | 3               | 2.0  | 0.0022  |

(2) [Fe(N(SiMe<sub>3</sub>)<sub>2</sub>)<sub>2</sub>(PMe<sub>3</sub>)]

| SO State | energy [cm <sup>-1</sup> ] | Spin-free state | Spin | Weights | Spin-free state | Spin | Weights | Spin-free state | Spin | Weights |
|----------|----------------------------|-----------------|------|---------|-----------------|------|---------|-----------------|------|---------|
| CASSCF   |                            |                 |      |         |                 |      |         |                 |      |         |
| 1        | 0                          | 1               | 2.0  | 0.6380  | 2               | 2.0  | 0.3606  | 6               | 1.0  | 0.0003  |
| 2        | 0                          | 1               | 2.0  | 0.6380  | 2               | 2.0  | 0.3606  | 6               | 1.0  | 0.0003  |
| 3        | 99                         | 1               | 2.0  | 0.7435  | 2               | 2.0  | 0.2536  | 3               | 2.0  | 0.0016  |
| 4        | 116                        | 1               | 2.0  | 0.7377  | 2               | 2.0  | 0.2597  | 3               | 2.0  | 0.0016  |
| 5        | 153                        | 1               | 2.0  | 0.9969  | 3               | 2.0  | 0.0018  | 4               | 2.0  | 0.0004  |
| 6        | 701                        | 2               | 2.0  | 0.9922  | 3               | 2.0  | 0.0051  | 1               | 2.0  | 0.0017  |
| 7        | 738                        | 2               | 2.0  | 0.7334  | 1               | 2.0  | 0.2582  | 3               | 2.0  | 0.0071  |
| 8        | 757                        | 2               | 2.0  | 0.7435  | 1               | 2.0  | 0.2550  | 3               | 2.0  | 0.0005  |
| 9        | 859                        | 2               | 2.0  | 0.6365  | 1               | 2.0  | 0.3598  | 3               | 2.0  | 0.0023  |
| 10       | 859                        | 2               | 2.0  | 0.6386  | 1               | 2.0  | 0.3580  | 3               | 2.0  | 0.0019  |
| SSCASPT2 |                            |                 |      |         |                 |      |         |                 |      |         |
| 1        | 0                          | 1               | 2.0  | 0.7237  | 2               | 2.0  | 0.2750  | 6               | 1.0  | 0.0003  |
| 2        | 0                          | 1               | 2.0  | 0.7237  | 2               | 2.0  | 0.2750  | 6               | 1.0  | 0.0003  |
| 3        | 166                        | 1               | 2.0  | 0.8471  | 2               | 2.0  | 0.1502  | 3               | 2.0  | 0.0014  |
| 4        | 168                        | 1               | 2.0  | 0.8496  | 2               | 2.0  | 0.1479  | 3               | 2.0  | 0.0015  |
| 5        | 324                        | 1               | 2.0  | 0.9970  | 3               | 2.0  | 0.0018  | 4               | 2.0  | 0.0003  |
| 6        | 344                        | 2               | 2.0  | 0.9917  | 3               | 2.0  | 0.0056  | 1               | 2.0  | 0.0018  |
| 7        | 487                        | 2               | 2.0  | 0.8448  | 1               | 2.0  | 0.1463  | 3               | 2.0  | 0.0077  |
| 8        | 518                        | 2               | 2.0  | 0.8467  | 1               | 2.0  | 0.1516  | 3               | 2.0  | 0.0008  |
| 9        | 671                        | 2               | 2.0  | 0.7220  | 1               | 2.0  | 0.2743  | 3               | 2.0  | 0.0024  |
| 10       | 672                        | 2               | 2.0  | 0.7244  | 1               | 2.0  | 0.2723  | 3               | 2.0  | 0.0019  |
| MSCASPT2 |                            |                 |      |         |                 |      |         |                 |      |         |
| 1        | 0                          | 1               | 2.0  | 0.7281  | 2               | 2.0  | 0.2705  | 6               | 1.0  | 0.0003  |
| 2        | 0                          | 1               | 2.0  | 0.7282  | 2               | 2.0  | 0.2705  | 6               | 1.0  | 0.0003  |
| 3        | 146                        | 1               | 2.0  | 0.8515  | 2               | 2.0  | 0.1458  | 3               | 2.0  | 0.0014  |
| 4        | 151                        | 1               | 2.0  | 0.8542  | 2               | 2.0  | 0.1433  | 3               | 2.0  | 0.0015  |
| 5        | 232                        | 1               | 2.0  | 0.9970  | 3               | 2.0  | 0.0018  | 4               | 2.0  | 0.0003  |
| 6        | 486                        | 2               | 2.0  | 0.9917  | 3               | 2.0  | 0.0056  | 1               | 2.0  | 0.0017  |
| 7        | 554                        | 2               | 2.0  | 0.8494  | 1               | 2.0  | 0.1417  | 3               | 2.0  | 0.0077  |
| 8        | 588                        | 2               | 2.0  | 0.8511  | 1               | 2.0  | 0.1472  | 3               | 2.0  | 0.0008  |
| 9        | 722                        | 2               | 2.0  | 0.7264  | 1               | 2.0  | 0.2698  | 3               | 2.0  | 0.0024  |
| 10       | 723                        | 2               | 2.0  | 0.7289  | 1               | 2.0  | 0.2679  | 3               | 2.0  | 0.0019  |

(3) [Fe(N(SiMe<sub>3</sub>)<sub>2</sub>)<sub>2</sub>(AsPh<sub>3</sub>)]

| SO State | energy [cm <sup>-1</sup> ] | Spin-free state | Spin | Weights | Spin-free state | Spin | Weights | Spin-free state | Spin | Weights |
|----------|----------------------------|-----------------|------|---------|-----------------|------|---------|-----------------|------|---------|
| CASSCF   |                            |                 |      |         |                 |      |         |                 |      |         |
| 1        | 0                          | 1               | 2.0  | 0.6222  | 2               | 2.0  | 0.3763  | 6               | 1.0  | 0.0003  |
| 2        | 0                          | 1               | 2.0  | 0.6217  | 2               | 2.0  | 0.3769  | 6               | 1.0  | 0.0003  |
| 3        | 158                        | 1               | 2.0  | 0.7425  | 2               | 2.0  | 0.2532  | 3               | 2.0  | 0.0032  |
| 4        | 164                        | 1               | 2.0  | 0.7121  | 2               | 2.0  | 0.2847  | 3               | 2.0  | 0.0022  |
| 5        | 264                        | 1               | 2.0  | 0.9928  | 3               | 2.0  | 0.0044  | 2               | 2.0  | 0.0018  |
| 6        | 444                        | 2               | 2.0  | 0.9946  | 3               | 2.0  | 0.0030  | 1               | 2.0  | 0.0010  |
| 7        | 535                        | 2               | 2.0  | 0.7365  | 1               | 2.0  | 0.2557  | 3               | 2.0  | 0.0065  |
| 8        | 560                        | 2               | 2.0  | 0.7179  | 1               | 2.0  | 0.2805  | 4               | 2.0  | 0.0005  |
| 9        | 710                        | 2               | 2.0  | 0.6203  | 1               | 2.0  | 0.3756  | 3               | 2.0  | 0.0024  |
| 10       | 710                        | 2               | 2.0  | 0.6204  | 1               | 2.0  | 0.3758  | 3               | 2.0  | 0.0022  |
| SSCASPT2 |                            |                 |      |         |                 |      |         |                 |      |         |
| 1        | 0                          | 1               | 2.0  | 0.5128  | 2               | 2.0  | 0.4858  | 6               | 1.0  | 0.0003  |
| 2        | 0                          | 1               | 2.0  | 0.5126  | 2               | 2.0  | 0.4860  | 6               | 1.0  | 0.0003  |
| 3        | 172                        | 1               | 2.0  | 0.5330  | 2               | 2.0  | 0.4639  | 3               | 2.0  | 0.0018  |
| 4        | 173                        | 1               | 2.0  | 0.5056  | 2               | 2.0  | 0.4913  | 3               | 2.0  | 0.0020  |
| 5        | 337                        | 1               | 2.0  | 0.9284  | 2               | 2.0  | 0.0675  | 3               | 2.0  | 0.0030  |
| 6        | 352                        | 2               | 2.0  | 0.9270  | 1               | 2.0  | 0.0688  | 3               | 2.0  | 0.0031  |
| 7        | 504                        | 2               | 2.0  | 0.5092  | 1               | 2.0  | 0.4836  | 3               | 2.0  | 0.0058  |
| 8        | 530                        | 2               | 2.0  | 0.5273  | 1               | 2.0  | 0.4713  | 4               | 2.0  | 0.0004  |
| 9        | 689                        | 2               | 2.0  | 0.5115  | 1               | 2.0  | 0.4849  | 3               | 2.0  | 0.0020  |
| 10       | 689                        | 2               | 2.0  | 0.5124  | 1               | 2.0  | 0.4842  | 3               | 2.0  | 0.0018  |
| MSCASPT2 |                            |                 |      |         |                 |      |         |                 |      |         |
| 1        | 0                          | 1               | 2.0  | 0.6716  | 2               | 2.0  | 0.3270  | 6               | 1.0  | 0.0003  |
| 2        | 0                          | 1               | 2.0  | 0.6714  | 2               | 2.0  | 0.3272  | 6               | 1.0  | 0.0003  |
| 3        | 152                        | 1               | 2.0  | 0.7966  | 2               | 2.0  | 0.2001  | 3               | 2.0  | 0.0018  |
| 4        | 157                        | 1               | 2.0  | 0.7848  | 2               | 2.0  | 0.2126  | 3               | 2.0  | 0.0015  |
| 5        | 243                        | 1               | 2.0  | 0.9960  | 3               | 2.0  | 0.0022  | 2               | 2.0  | 0.0006  |
| 6        | 490                        | 2               | 2.0  | 0.9935  | 3               | 2.0  | 0.0040  | 1               | 2.0  | 0.0014  |
| 7        | 565                        | 2               | 2.0  | 0.7885  | 1               | 2.0  | 0.2040  | 3               | 2.0  | 0.0061  |
| 8        | 593                        | 2               | 2.0  | 0.7901  | 1               | 2.0  | 0.2083  | 3               | 2.0  | 0.0004  |
| 9        | 734                        | 2               | 2.0  | 0.6701  | 1               | 2.0  | 0.3263  | 3               | 2.0  | 0.0020  |
| 10       | 735                        | 2               | 2.0  | 0.6715  | 1               | 2.0  | 0.3252  | 3               | 2.0  | 0.0018  |

(4) [Fe(N(SiMe<sub>3</sub>)<sub>2</sub>(OPPh<sub>3</sub>))<sub>2</sub>]

| SO State | energy [cm <sup>-1</sup> ] | Spin-free state | Spin | Weights | Spin-free state | Spin | Weights | Spin-free state | Spin | Weights |
|----------|----------------------------|-----------------|------|---------|-----------------|------|---------|-----------------|------|---------|
| CASSCF   |                            |                 |      |         |                 |      |         |                 |      |         |
| 1        | 0                          | 1               | 2.0  | 0.9768  | 2               | 2.0  | 0.0180  | 3               | 2.0  | 0.0039  |
| 2        | 5                          | 1               | 2.0  | 0.9764  | 2               | 2.0  | 0.0209  | 3               | 2.0  | 0.0016  |
| 3        | 20                         | 1               | 2.0  | 0.9866  | 3               | 2.0  | 0.0075  | 2               | 2.0  | 0.0048  |
| 4        | 46                         | 1               | 2.0  | 0.9909  | 2               | 2.0  | 0.0061  | 3               | 2.0  | 0.0022  |
| 5        | 47                         | 1               | 2.0  | 0.9927  | 3               | 2.0  | 0.0036  | 2               | 2.0  | 0.0029  |
| 6        | 2172                       | 2               | 2.0  | 0.9808  | 3               | 2.0  | 0.0173  | 4               | 2.0  | 0.0005  |
| 7        | 2176                       | 2               | 2.0  | 0.9746  | 3               | 2.0  | 0.0201  | 1               | 2.0  | 0.0039  |
| 8        | 2196                       | 2               | 2.0  | 0.9876  | 1               | 2.0  | 0.0065  | 3               | 2.0  | 0.0039  |
| 9        | 2221                       | 2               | 2.0  | 0.9713  | 1               | 2.0  | 0.0200  | 3               | 2.0  | 0.0067  |
| 10       | 2224                       | 2               | 2.0  | 0.9755  | 1               | 2.0  | 0.0195  | 3               | 2.0  | 0.0030  |
| SSCASPT2 |                            |                 |      |         |                 |      |         |                 |      |         |
| 1        | 0                          | 1               | 2.0  | 0.9656  | 2               | 2.0  | 0.0296  | 3               | 2.0  | 0.0035  |
| 2        | 4                          | 1               | 2.0  | 0.9645  | 2               | 2.0  | 0.0328  | 3               | 2.0  | 0.0016  |
| 3        | 27                         | 1               | 2.0  | 0.9833  | 3               | 2.0  | 0.0079  | 2               | 2.0  | 0.0077  |
| 4        | 53                         | 1               | 2.0  | 0.9870  | 2               | 2.0  | 0.0098  | 3               | 2.0  | 0.0024  |
| 5        | 57                         | 1               | 2.0  | 0.9916  | 3               | 2.0  | 0.0044  | 2               | 2.0  | 0.0032  |
| 6        | 1724                       | 2               | 2.0  | 0.9875  | 3               | 2.0  | 0.0108  | 4               | 2.0  | 0.0004  |
| 7        | 1732                       | 2               | 2.0  | 0.9784  | 3               | 2.0  | 0.0136  | 1               | 2.0  | 0.0067  |
| 8        | 1748                       | 2               | 2.0  | 0.9857  | 1               | 2.0  | 0.0103  | 3               | 2.0  | 0.0023  |
| 9        | 1782                       | 2               | 2.0  | 0.9614  | 1               | 2.0  | 0.0319  | 3               | 2.0  | 0.0048  |
| 10       | 1784                       | 2               | 2.0  | 0.9637  | 1               | 2.0  | 0.0315  | 3               | 2.0  | 0.0029  |
| MSCASPT2 |                            |                 |      |         |                 |      |         |                 |      |         |
| 1        | 0                          | 1               | 2.0  | 0.9657  | 2               | 2.0  | 0.0295  | 3               | 2.0  | 0.0035  |
| 2        | 4                          | 1               | 2.0  | 0.9646  | 2               | 2.0  | 0.0327  | 3               | 2.0  | 0.0016  |
| 3        | 27                         | 1               | 2.0  | 0.9834  | 3               | 2.0  | 0.0079  | 2               | 2.0  | 0.0076  |
| 4        | 53                         | 1               | 2.0  | 0.9870  | 2               | 2.0  | 0.0098  | 3               | 2.0  | 0.0024  |
| 5        | 56                         | 1               | 2.0  | 0.9916  | 3               | 2.0  | 0.0044  | 2               | 2.0  | 0.0032  |
| 6        | 1728                       | 2               | 2.0  | 0.9875  | 3               | 2.0  | 0.0108  | 4               | 2.0  | 0.0005  |
| 7        | 1736                       | 2               | 2.0  | 0.9784  | 3               | 2.0  | 0.0136  | 1               | 2.0  | 0.0067  |
| 8        | 1752                       | 2               | 2.0  | 0.9857  | 1               | 2.0  | 0.0102  | 3               | 2.0  | 0.0023  |
| 9        | 1786                       | 2               | 2.0  | 0.9616  | 1               | 2.0  | 0.0318  | 3               | 2.0  | 0.0048  |
| 10       | 1788                       | 2               | 2.0  | 0.9638  | 1               | 2.0  | 0.0313  | 3               | 2.0  | 0.0029  |

**(5a)** [Fe(N(SiMe<sub>3</sub>)<sub>2</sub>)(Py)]

| SO State | energy [cm <sup>-1</sup> ] | Spin-free state | Spin | Weights | Spin-free state | Spin | Weights | Spin-free state | Spin | Weights |
|----------|----------------------------|-----------------|------|---------|-----------------|------|---------|-----------------|------|---------|
| CASSCF   |                            |                 |      |         |                 |      |         |                 |      |         |
| 1        | 0                          | 1               | 2.0  | 0.9313  | 2               | 2.0  | 0.0652  | 3               | 2.0  | 0.0022  |
| 2        | 2                          | 1               | 2.0  | 0.9296  | 2               | 2.0  | 0.0679  | 3               | 2.0  | 0.0013  |
| 3        | 48                         | 1               | 2.0  | 0.9743  | 2               | 2.0  | 0.0173  | 3               | 2.0  | 0.0072  |
| 4        | 72                         | 1               | 2.0  | 0.9748  | 2               | 2.0  | 0.0219  | 3               | 2.0  | 0.0024  |
| 5        | 83                         | 1               | 2.0  | 0.9911  | 3               | 2.0  | 0.0051  | 2               | 2.0  | 0.0029  |
| 6        | 1211                       | 2               | 2.0  | 0.9926  | 3               | 2.0  | 0.0057  | 4               | 2.0  | 0.0006  |
| 7        | 1227                       | 2               | 2.0  | 0.9741  | 1               | 2.0  | 0.0163  | 3               | 2.0  | 0.0082  |
| 8        | 1241                       | 2               | 2.0  | 0.9747  | 1               | 2.0  | 0.0224  | 3               | 2.0  | 0.0011  |
| 9        | 1296                       | 2               | 2.0  | 0.9280  | 1               | 2.0  | 0.0671  | 3               | 2.0  | 0.0031  |
| 10       | 1297                       | 2               | 2.0  | 0.9288  | 1               | 2.0  | 0.0667  | 3               | 2.0  | 0.0025  |
| SSCASPT2 |                            |                 |      |         |                 |      |         |                 |      |         |
| 1        | 0                          | 1               | 2.0  | 0.8521  | 2               | 2.0  | 0.1454  | 3               | 2.0  | 0.0013  |
| 2        | 1                          | 1               | 2.0  | 0.8502  | 2               | 2.0  | 0.1477  | 3               | 2.0  | 0.0009  |
| 3        | 82                         | 1               | 2.0  | 0.9466  | 2               | 2.0  | 0.0459  | 3               | 2.0  | 0.0063  |
| 4        | 102                        | 1               | 2.0  | 0.9385  | 2               | 2.0  | 0.0582  | 3               | 2.0  | 0.0024  |
| 5        | 129                        | 1               | 2.0  | 0.9909  | 3               | 2.0  | 0.0055  | 2               | 2.0  | 0.0027  |
| 6        | 788                        | 2               | 2.0  | 0.9949  | 3               | 2.0  | 0.0036  | 4               | 2.0  | 0.0005  |
| 7        | 818                        | 2               | 2.0  | 0.9480  | 1               | 2.0  | 0.0445  | 3               | 2.0  | 0.0062  |
| 8        | 833                        | 2               | 2.0  | 0.9392  | 1               | 2.0  | 0.0586  | 4               | 2.0  | 0.0006  |
| 9        | 920                        | 2               | 2.0  | 0.8488  | 1               | 2.0  | 0.1469  | 3               | 2.0  | 0.0025  |
| 10       | 920                        | 2               | 2.0  | 0.8494  | 1               | 2.0  | 0.1464  | 3               | 2.0  | 0.0024  |
| MSCASPT2 |                            |                 |      |         |                 |      |         |                 |      |         |
| 1        | 0                          | 1               | 2.0  | 0.8548  | 2               | 2.0  | 0.1426  | 3               | 2.0  | 0.0013  |
| 2        | 1                          | 1               | 2.0  | 0.8530  | 2               | 2.0  | 0.1449  | 3               | 2.0  | 0.0009  |
| 3        | 81                         | 1               | 2.0  | 0.9478  | 2               | 2.0  | 0.0447  | 3               | 2.0  | 0.0063  |
| 4        | 101                        | 1               | 2.0  | 0.9400  | 2               | 2.0  | 0.0567  | 3               | 2.0  | 0.0024  |
| 5        | 127                        | 1               | 2.0  | 0.9909  | 3               | 2.0  | 0.0054  | 2               | 2.0  | 0.0027  |
| 6        | 797                        | 2               | 2.0  | 0.9949  | 3               | 2.0  | 0.0036  | 4               | 2.0  | 0.0005  |
| 7        | 827                        | 2               | 2.0  | 0.9492  | 1               | 2.0  | 0.0433  | 3               | 2.0  | 0.0061  |
| 8        | 841                        | 2               | 2.0  | 0.9407  | 1               | 2.0  | 0.0571  | 4               | 2.0  | 0.0007  |
| 9        | 927                        | 2               | 2.0  | 0.8515  | 1               | 2.0  | 0.1441  | 3               | 2.0  | 0.0025  |
| 10       | 927                        | 2               | 2.0  | 0.8522  | 1               | 2.0  | 0.1436  | 3               | 2.0  | 0.0023  |

**(5b)** [Fe(N(SiMe<sub>3</sub>)<sub>2</sub>)(Py)]

| SO State | energy [cm <sup>-1</sup> ] | Spin-free state | Spin | Weights | Spin-free state | Spin | Weights | Spin-free state | Spin | Weights |
|----------|----------------------------|-----------------|------|---------|-----------------|------|---------|-----------------|------|---------|
| CASSCF   |                            |                 |      |         |                 |      |         |                 |      |         |
| 1        | 0                          | 1               | 2.0  | 0.9372  | 2               | 2.0  | 0.0589  | 3               | 2.0  | 0.0026  |
| 2        | 3                          | 1               | 2.0  | 0.9355  | 2               | 2.0  | 0.0619  | 3               | 2.0  | 0.0014  |
| 3        | 44                         | 1               | 2.0  | 0.9754  | 2               | 2.0  | 0.0155  | 3               | 2.0  | 0.0080  |
| 4        | 69                         | 1               | 2.0  | 0.9767  | 2               | 2.0  | 0.0198  | 3               | 2.0  | 0.0026  |
| 5        | 79                         | 1               | 2.0  | 0.9905  | 3               | 2.0  | 0.0055  | 2               | 2.0  | 0.0032  |
| 6        | 1269                       | 2               | 2.0  | 0.9915  | 3               | 2.0  | 0.0069  | 4               | 2.0  | 0.0005  |
| 7        | 1284                       | 2               | 2.0  | 0.9747  | 1               | 2.0  | 0.0142  | 3               | 2.0  | 0.0098  |
| 8        | 1298                       | 2               | 2.0  | 0.9765  | 1               | 2.0  | 0.0204  | 3               | 2.0  | 0.0013  |
| 9        | 1351                       | 2               | 2.0  | 0.9335  | 1               | 2.0  | 0.0610  | 3               | 2.0  | 0.0037  |
| 10       | 1352                       | 2               | 2.0  | 0.9347  | 1               | 2.0  | 0.0606  | 3               | 2.0  | 0.0029  |
| SSCASPT2 |                            |                 |      |         |                 |      |         |                 |      |         |
| 1        | 0                          | 1               | 2.0  | 0.8766  | 2               | 2.0  | 0.1206  | 3               | 2.0  | 0.0016  |
| 2        | 1                          | 1               | 2.0  | 0.8745  | 2               | 2.0  | 0.1232  | 3               | 2.0  | 0.0010  |
| 3        | 72                         | 1               | 2.0  | 0.9560  | 2               | 2.0  | 0.0356  | 3               | 2.0  | 0.0072  |
| 4        | 93                         | 1               | 2.0  | 0.9508  | 2               | 2.0  | 0.0456  | 3               | 2.0  | 0.0027  |
| 5        | 115                        | 1               | 2.0  | 0.9902  | 3               | 2.0  | 0.0059  | 2               | 2.0  | 0.0030  |
| 6        | 873                        | 2               | 2.0  | 0.9942  | 3               | 2.0  | 0.0043  | 4               | 2.0  | 0.0005  |
| 7        | 898                        | 2               | 2.0  | 0.9575  | 1               | 2.0  | 0.0341  | 3               | 2.0  | 0.0071  |
| 8        | 913                        | 2               | 2.0  | 0.9515  | 1               | 2.0  | 0.0463  | 4               | 2.0  | 0.0006  |
| 9        | 991                        | 2               | 2.0  | 0.8730  | 1               | 2.0  | 0.1223  | 3               | 2.0  | 0.0029  |
| 10       | 991                        | 2               | 2.0  | 0.8738  | 1               | 2.0  | 0.1218  | 3               | 2.0  | 0.0026  |
| MSCASPT2 |                            |                 |      |         |                 |      |         |                 |      |         |
| 1        | 0                          | 1               | 2.0  | 0.8785  | 2               | 2.0  | 0.1187  | 3               | 2.0  | 0.0016  |
| 2        | 1                          | 1               | 2.0  | 0.8765  | 2               | 2.0  | 0.1213  | 3               | 2.0  | 0.0010  |
| 3        | 71                         | 1               | 2.0  | 0.9567  | 2               | 2.0  | 0.0349  | 3               | 2.0  | 0.0072  |
| 4        | 93                         | 1               | 2.0  | 0.9518  | 2               | 2.0  | 0.0447  | 3               | 2.0  | 0.0026  |
| 5        | 114                        | 1               | 2.0  | 0.9903  | 3               | 2.0  | 0.0058  | 2               | 2.0  | 0.0030  |
| 6        | 881                        | 2               | 2.0  | 0.9942  | 3               | 2.0  | 0.0043  | 4               | 2.0  | 0.0005  |
| 7        | 906                        | 2               | 2.0  | 0.9582  | 1               | 2.0  | 0.0334  | 3               | 2.0  | 0.0071  |
| 8        | 921                        | 2               | 2.0  | 0.9524  | 1               | 2.0  | 0.0454  | 4               | 2.0  | 0.0006  |
| 9        | 998                        | 2               | 2.0  | 0.8749  | 1               | 2.0  | 0.1204  | 3               | 2.0  | 0.0029  |
| 10       | 998                        | 2               | 2.0  | 0.8757  | 1               | 2.0  | 0.1199  | 3               | 2.0  | 0.0026  |



(6) [Fe(N(SiMe<sub>3</sub>)<sub>2</sub>)<sub>2</sub>(THF)]

| SO State | energy [cm <sup>-1</sup> ] | Spin-free state | Spin | Weights | Spin-free state | Spin | Weights | Spin-free state | Spin | Weights |
|----------|----------------------------|-----------------|------|---------|-----------------|------|---------|-----------------|------|---------|
| CASSCF   |                            |                 |      |         |                 |      |         |                 |      |         |
| 1        | 0                          | 1               | 2.0  | 0.9523  | 2               | 2.0  | 0.0440  | 3               | 2.0  | 0.0025  |
| 2        | 3                          | 1               | 2.0  | 0.9508  | 2               | 2.0  | 0.0467  | 3               | 2.0  | 0.0013  |
| 3        | 37                         | 1               | 2.0  | 0.9807  | 2               | 2.0  | 0.0114  | 3               | 2.0  | 0.0067  |
| 4        | 61                         | 1               | 2.0  | 0.9827  | 2               | 2.0  | 0.0143  | 3               | 2.0  | 0.0021  |
| 5        | 68                         | 1               | 2.0  | 0.9920  | 3               | 2.0  | 0.0043  | 2               | 2.0  | 0.0028  |
| 6        | 1467                       | 2               | 2.0  | 0.9924  | 3               | 2.0  | 0.0060  | 4               | 2.0  | 0.0006  |
| 7        | 1479                       | 2               | 2.0  | 0.9799  | 1               | 2.0  | 0.0105  | 3               | 2.0  | 0.0082  |
| 8        | 1491                       | 2               | 2.0  | 0.9822  | 1               | 2.0  | 0.0147  | 3               | 2.0  | 0.0012  |
| 9        | 1535                       | 2               | 2.0  | 0.9490  | 1               | 2.0  | 0.0460  | 3               | 2.0  | 0.0030  |
| 10       | 1536                       | 2               | 2.0  | 0.9500  | 1               | 2.0  | 0.0457  | 3               | 2.0  | 0.0023  |
| SSCASPT2 |                            |                 |      |         |                 |      |         |                 |      |         |
| 1        | 0                          | 1               | 2.0  | 0.9030  | 2               | 2.0  | 0.0941  | 3               | 2.0  | 0.0017  |
| 2        | 2                          | 1               | 2.0  | 0.9011  | 2               | 2.0  | 0.0967  | 3               | 2.0  | 0.0010  |
| 3        | 61                         | 1               | 2.0  | 0.9660  | 2               | 2.0  | 0.0263  | 3               | 2.0  | 0.0066  |
| 4        | 83                         | 1               | 2.0  | 0.9635  | 2               | 2.0  | 0.0334  | 3               | 2.0  | 0.0023  |
| 5        | 100                        | 1               | 2.0  | 0.9912  | 3               | 2.0  | 0.0051  | 2               | 2.0  | 0.0028  |
| 6        | 994                        | 2               | 2.0  | 0.9946  | 3               | 2.0  | 0.0040  | 4               | 2.0  | 0.0005  |
| 7        | 1016                       | 2               | 2.0  | 0.9673  | 1               | 2.0  | 0.0251  | 3               | 2.0  | 0.0063  |
| 8        | 1029                       | 2               | 2.0  | 0.9638  | 1               | 2.0  | 0.0339  | 3               | 2.0  | 0.0006  |
| 9        | 1096                       | 2               | 2.0  | 0.8996  | 1               | 2.0  | 0.0960  | 3               | 2.0  | 0.0025  |
| 10       | 1096                       | 2               | 2.0  | 0.9003  | 1               | 2.0  | 0.0956  | 3               | 2.0  | 0.0022  |
| MSCASPT2 |                            |                 |      |         |                 |      |         |                 |      |         |
| 1        | 0                          | 1               | 2.0  | 0.9046  | 2               | 2.0  | 0.0925  | 3               | 2.0  | 0.0017  |
| 2        | 2                          | 1               | 2.0  | 0.9027  | 2               | 2.0  | 0.0951  | 3               | 2.0  | 0.0010  |
| 3        | 61                         | 1               | 2.0  | 0.9665  | 2               | 2.0  | 0.0258  | 3               | 2.0  | 0.0066  |
| 4        | 83                         | 1               | 2.0  | 0.9642  | 2               | 2.0  | 0.0327  | 3               | 2.0  | 0.0023  |
| 5        | 99                         | 1               | 2.0  | 0.9912  | 3               | 2.0  | 0.0050  | 2               | 2.0  | 0.0028  |
| 6        | 1004                       | 2               | 2.0  | 0.9946  | 3               | 2.0  | 0.0040  | 4               | 2.0  | 0.0005  |
| 7        | 1025                       | 2               | 2.0  | 0.9678  | 1               | 2.0  | 0.0246  | 3               | 2.0  | 0.0063  |
| 8        | 1038                       | 2               | 2.0  | 0.9645  | 1               | 2.0  | 0.0333  | 3               | 2.0  | 0.0006  |
| 9        | 1104                       | 2               | 2.0  | 0.9012  | 1               | 2.0  | 0.0944  | 3               | 2.0  | 0.0025  |
| 10       | 1105                       | 2               | 2.0  | 0.9019  | 1               | 2.0  | 0.0940  | 3               | 2.0  | 0.0022  |

(7) [Fe(N(SiMe<sub>3</sub>)<sub>2</sub>(PCy<sub>3</sub>)]

| SO State | energy [cm <sup>-1</sup> ] | Spin-free state | Spin | Weights | Spin-free state | Spin | Weights | Spin-free state | Spin | Weights |
|----------|----------------------------|-----------------|------|---------|-----------------|------|---------|-----------------|------|---------|
| CASSCF   |                            |                 |      |         |                 |      |         |                 |      |         |
| 1        | 0                          | 1               | 2.0  | 0.6310  | 2               | 2.0  | 0.3674  | 3               | 2.0  | 0.0003  |
| 2        | 0                          | 1               | 2.0  | 0.6304  | 2               | 2.0  | 0.3681  | 6               | 1.0  | 0.0003  |
| 3        | 153                        | 1               | 2.0  | 0.7558  | 2               | 2.0  | 0.2385  | 3               | 2.0  | 0.0045  |
| 4        | 160                        | 1               | 2.0  | 0.7235  | 2               | 2.0  | 0.2724  | 3               | 2.0  | 0.0030  |
| 5        | 255                        | 1               | 2.0  | 0.9905  | 3               | 2.0  | 0.0061  | 2               | 2.0  | 0.0024  |
| 6        | 447                        | 2               | 2.0  | 0.9926  | 3               | 2.0  | 0.0045  | 1               | 2.0  | 0.0015  |
| 7        | 533                        | 2               | 2.0  | 0.7489  | 1               | 2.0  | 0.2404  | 3               | 2.0  | 0.0094  |
| 8        | 562                        | 2               | 2.0  | 0.7301  | 1               | 2.0  | 0.2683  | 4               | 2.0  | 0.0005  |
| 9        | 708                        | 2               | 2.0  | 0.6285  | 1               | 2.0  | 0.3664  | 3               | 2.0  | 0.0035  |
| 10       | 709                        | 2               | 2.0  | 0.6288  | 1               | 2.0  | 0.3664  | 3               | 2.0  | 0.0031  |
| SSCASPT2 |                            |                 |      |         |                 |      |         |                 |      |         |
| 1        | 0                          | 1               | 2.0  | 0.5229  | 2               | 2.0  | 0.4756  | 6               | 1.0  | 0.0003  |
| 2        | 0                          | 1               | 2.0  | 0.5226  | 2               | 2.0  | 0.4760  | 6               | 1.0  | 0.0003  |
| 3        | 169                        | 1               | 2.0  | 0.5679  | 2               | 2.0  | 0.4277  | 3               | 2.0  | 0.0033  |
| 4        | 170                        | 1               | 2.0  | 0.5335  | 2               | 2.0  | 0.4625  | 3               | 2.0  | 0.0028  |
| 5        | 320                        | 1               | 2.0  | 0.9732  | 2               | 2.0  | 0.0196  | 3               | 2.0  | 0.0062  |
| 6        | 360                        | 2               | 2.0  | 0.9762  | 1               | 2.0  | 0.0191  | 3               | 2.0  | 0.0035  |
| 7        | 497                        | 2               | 2.0  | 0.5580  | 1               | 2.0  | 0.4315  | 3               | 2.0  | 0.0092  |
| 8        | 529                        | 2               | 2.0  | 0.5428  | 1               | 2.0  | 0.4558  | 4               | 2.0  | 0.0004  |
| 9        | 685                        | 2               | 2.0  | 0.5212  | 1               | 2.0  | 0.4741  | 3               | 2.0  | 0.0032  |
| 10       | 685                        | 2               | 2.0  | 0.5205  | 1               | 2.0  | 0.4750  | 3               | 2.0  | 0.0029  |
| MSCASPT2 |                            |                 |      |         |                 |      |         |                 |      |         |
| 1        | 0                          | 1               | 2.0  | 0.7046  | 2               | 2.0  | 0.2939  | 6               | 1.0  | 0.0003  |
| 2        | 0                          | 1               | 2.0  | 0.7043  | 2               | 2.0  | 0.2942  | 6               | 1.0  | 0.0003  |
| 3        | 142                        | 1               | 2.0  | 0.8348  | 2               | 2.0  | 0.1609  | 3               | 2.0  | 0.0030  |
| 4        | 148                        | 1               | 2.0  | 0.8235  | 2               | 2.0  | 0.1733  | 3               | 2.0  | 0.0022  |
| 5        | 222                        | 1               | 2.0  | 0.9945  | 3               | 2.0  | 0.0035  | 2               | 2.0  | 0.0008  |
| 6        | 523                        | 2               | 2.0  | 0.9904  | 3               | 2.0  | 0.0066  | 1               | 2.0  | 0.0019  |
| 7        | 585                        | 2               | 2.0  | 0.8267  | 1               | 2.0  | 0.1620  | 3               | 2.0  | 0.0100  |
| 8        | 619                        | 2               | 2.0  | 0.8266  | 1               | 2.0  | 0.1715  | 3               | 2.0  | 0.0008  |
| 9        | 750                        | 2               | 2.0  | 0.7021  | 1               | 2.0  | 0.2930  | 3               | 2.0  | 0.0034  |
| 10       | 751                        | 2               | 2.0  | 0.7044  | 1               | 2.0  | 0.2914  | 3               | 2.0  | 0.0028  |

**Table S6** Effective Spin Hamiltonian parameters for the lowest pseudo spin multiplett ( $S = 2$ ) of **1–7** from RASSI wave functions (Table S4) <sup>a</sup>

|                          | <b>1</b> |        |        | <b>2</b> |        |        | <b>3</b> |       |        |
|--------------------------|----------|--------|--------|----------|--------|--------|----------|-------|--------|
|                          | CAS      | SSPT2  | MSPT2  | CAS      | SSPT2  | MSPT2  | CAS      | SSPT2 | MSPT2  |
| $D$ [ $\text{cm}^{-1}$ ] | -36.88   | -69.95 | -54.27 | -58.79   | -49.87 | -49.39 | -60.54   | -72.5 | -56.77 |
| $E$ [ $\text{cm}^{-1}$ ] | 2.95     | 0.34   | 0.75   | 0.70     | 0.63   | 0.62   | 0.80     | 0.20  | 0.73   |
| $g_1$                    | 1.95     | 1.70   | 1.89   | 1.85     | 1.92   | 1.93   | 1.83     | 1.69  | 1.87   |
| $g_2$                    | 2.07     | 1.77   | 1.92   | 1.87     | 1.93   | 1.93   | 1.91     | 1.75  | 1.92   |
| $g_3^b$                  | 2.69     | 3.00   | 2.88   | 3.01     | 2.90   | 2.89   | 3.09     | 3.16  | 3.04   |

|                          | <b>4</b>            |                     |                     | <b>5a</b> |        |        | <b>5b</b> |        |        |
|--------------------------|---------------------|---------------------|---------------------|-----------|--------|--------|-----------|--------|--------|
|                          | CAS                 | SSPT2               | MSPT2               | CAS       | SSPT2  | MSPT2  | CAS       | SSPT2  | MSPT2  |
| $D$ [ $\text{cm}^{-1}$ ] | +11.06 <sup>c</sup> | +12.48 <sup>c</sup> | +12.46 <sup>c</sup> | -19.53    | -31.16 | -30.81 | -18.23    | -27.66 | -27.42 |
| $E$ [ $\text{cm}^{-1}$ ] | 2.39                | 3.83                | 3.82                | 3.90      | 3.12   | 3.14   | 4.09      | 3.47   | 3.48   |
| $g_1$                    | 2.25                | 1.99                | 1.99                | 1.99      | 1.96   | 1.96   | 1.99      | 1.97   | 1.97   |
| $g_2$                    | 2.17                | 2.14                | 2.14                | 2.12      | 2.09   | 2.09   | 2.13      | 2.11   | 2.11   |
| $g_3^b$                  | 2.00                | 2.31                | 2.31                | 2.44      | 2.64   | 2.63   | 2.42      | 2.58   | 2.58   |

|                          | <b>6</b> |        |        | <b>7</b> |       |        |
|--------------------------|----------|--------|--------|----------|-------|--------|
|                          | CAS      | SSPT2  | MSPT2  | CAS      | SSPT2 | MSPT2  |
| $D$ [ $\text{cm}^{-1}$ ] | -15.54   | -23.89 | -23.67 | -58.83   | -69.8 | -52.41 |
| $E$ [ $\text{cm}^{-1}$ ] | 4.00     | 3.60   | 3.61   | 1.36     | 0.55  | 1.17   |
| $g_1$                    | 1.99     | 1.98   | 1.98   | 1.83     | 1.71  | 1.90   |
| $g_2$                    | 2.12     | 2.11   | 2.11   | 1.95     | 1.81  | 1.95   |
| $g_3^b$                  | 2.36     | 2.51   | 2.51   | 2.85     | 2.91  | 2.77   |

<sup>a</sup> Note that these parameters may be less meaningful because of the quasi-degeneracy found in complexes **1–3** and **7**.

<sup>b</sup> Note that  $g$  is given with respect to the principal axis of the  $g$ -tensor, i. e. only in axial systems ( $D \ll 0$ ) the relation  $g_3 = g_z$  holds.

<sup>c</sup> The sign of the calculated  $D$  becomes ambiguous in the limit of extreme rhombicity ( $E/D \rightarrow 1/3$ ).

Table S7 Main values of the  $g$ -tensor and orientation of the corresponding magnetic main axes for the lowest pseudo spin multiplett a)  $S = 2$  and b)  $S = 1/2$  of **1–7** (MSPT2; Table S4, S5).<sup>a</sup>

a)

|           | $g_x$ | $g_y$ | $g_z$ | $\Phi_1$ | $\Phi_2$ |
|-----------|-------|-------|-------|----------|----------|
| <b>1</b>  | 1.89  | 1.92  | 2.88  | 89.5     | 93.7     |
| <b>2</b>  | 1.93  | 1.93  | 2.89  | 90.6     | 94.8     |
| <b>3</b>  | 1.87  | 1.92  | 3.04  | 89.5     | 77.5     |
| <b>4</b>  | 1.99  | 2.14  | 2.31  | 88.6     | 82.2     |
| <b>5a</b> | 1.96  | 2.09  | 2.63  | 90.4     | 89.6     |
| <b>5b</b> | 1.97  | 2.11  | 2.58  | 89.2     | 90.0     |
| <b>6</b>  | 1.98  | 2.11  | 2.51  | 88.4     | 89.9     |
| <b>7</b>  | 1.90  | 1.95  | 2.77  | 90.1     | 85.4     |

b)

|           | $g_x$ | $g_y$ | $g_z$ | $\Phi_1$ | $\Phi_2$ |
|-----------|-------|-------|-------|----------|----------|
| <b>1</b>  | 0     | 0     | 11.05 | 89.5     | 93.7     |
| <b>2</b>  | 0     | 0     | 11.17 | 90.4     | 93.8     |
| <b>3</b>  | 0     | 0     | 11.54 | 89.6     | 82.1     |
| <b>4</b>  | 0     | 0     | 8.85  | 89.4     | 87.7     |
| <b>5a</b> | 0     | 0     | 10.36 | 90.4     | 89.6     |
| <b>5b</b> | 0     | 0     | 10.16 | 89.2     | 90.0     |
| <b>6</b>  | 0     | 0     | 9.90  | 88.4     | 89.9     |
| <b>7</b>  | 0     | 0     | 10.71 | 90.1     | 88.3     |

<sup>a</sup> the magnetic main axes is characterized by its angle  $\Phi_1$  with the normal vector of the plane defined by the coordinating ligand atoms N, N, L and the angle  $\Phi_2$  with the vector lying on the Fe–L bond according to Fig. 1.

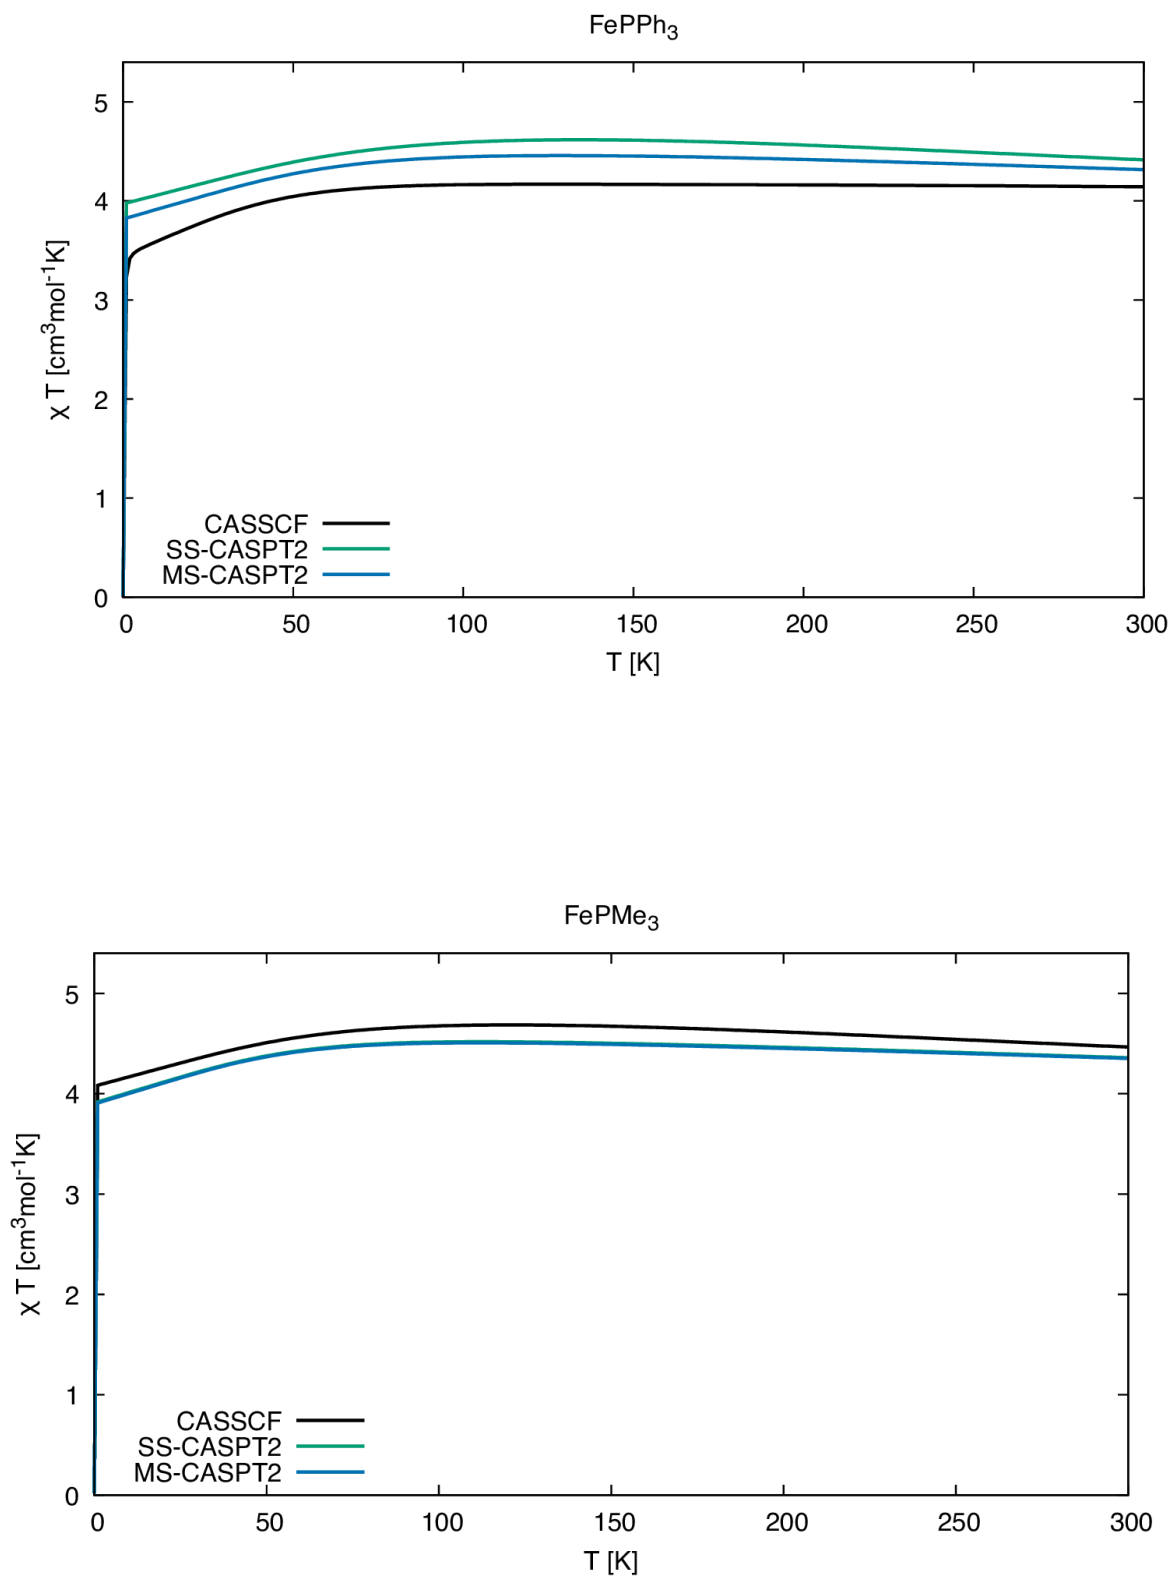

**Figure S23.** Temperature dependence of  $\chi T$  for **1** (up) and **2** (below) calculated by quantum chemical methods.

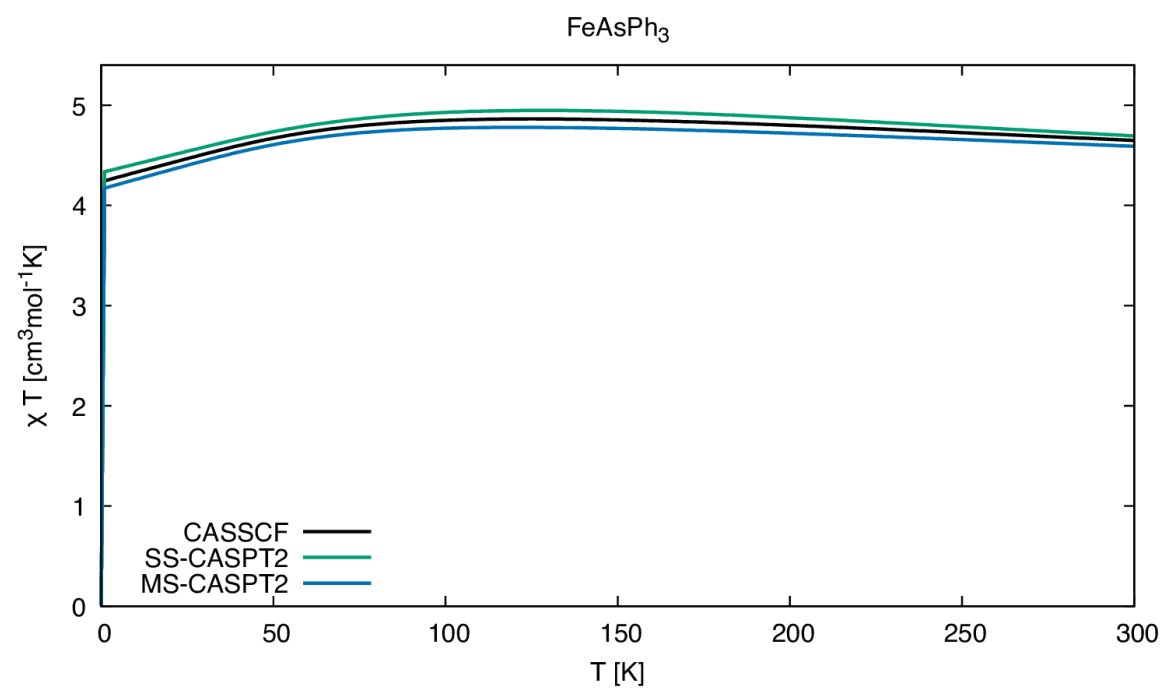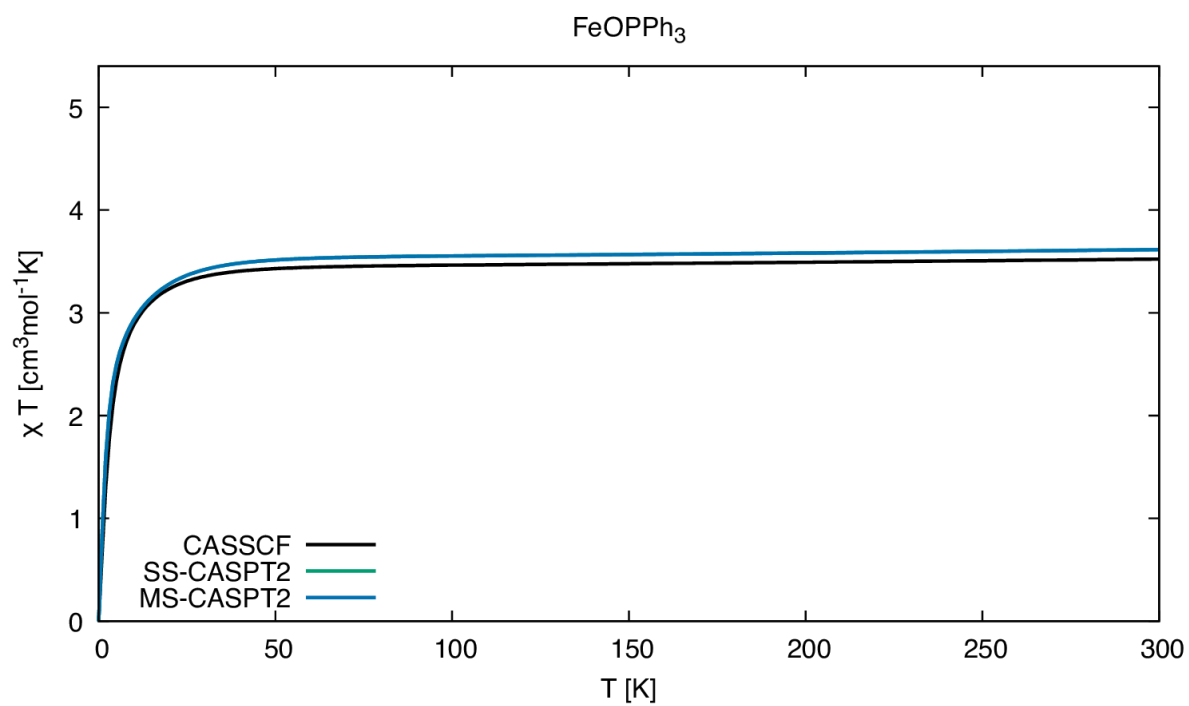

**Figure S24.** Temperature dependence of  $\chi T$  for **3** (up) and **4** (below) calculated by quantum chemical methods.

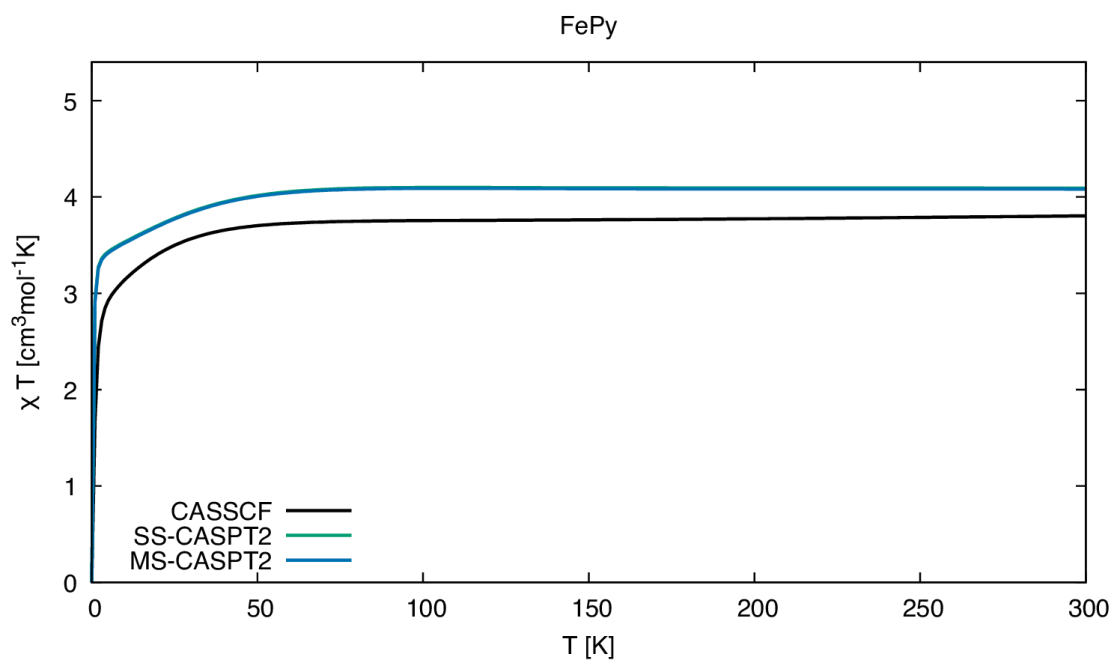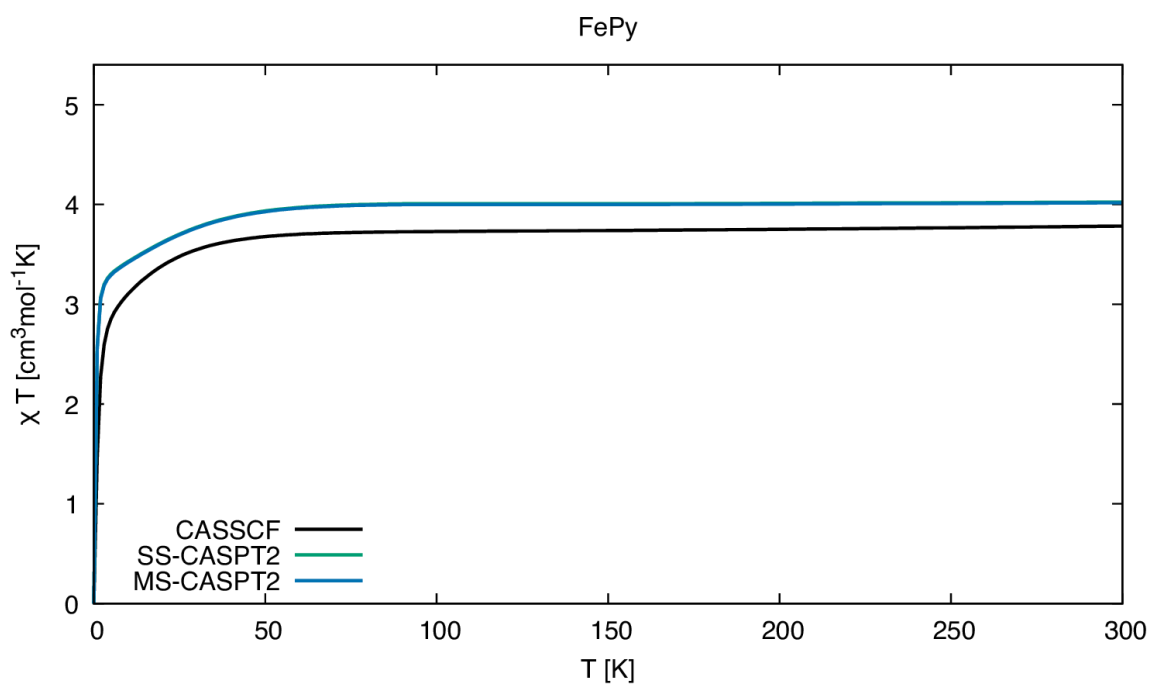

**Figure S25.** Temperature dependence of  $\chi T$  for **5a** (up) and **5b** (below) calculated by quantum chemical methods.

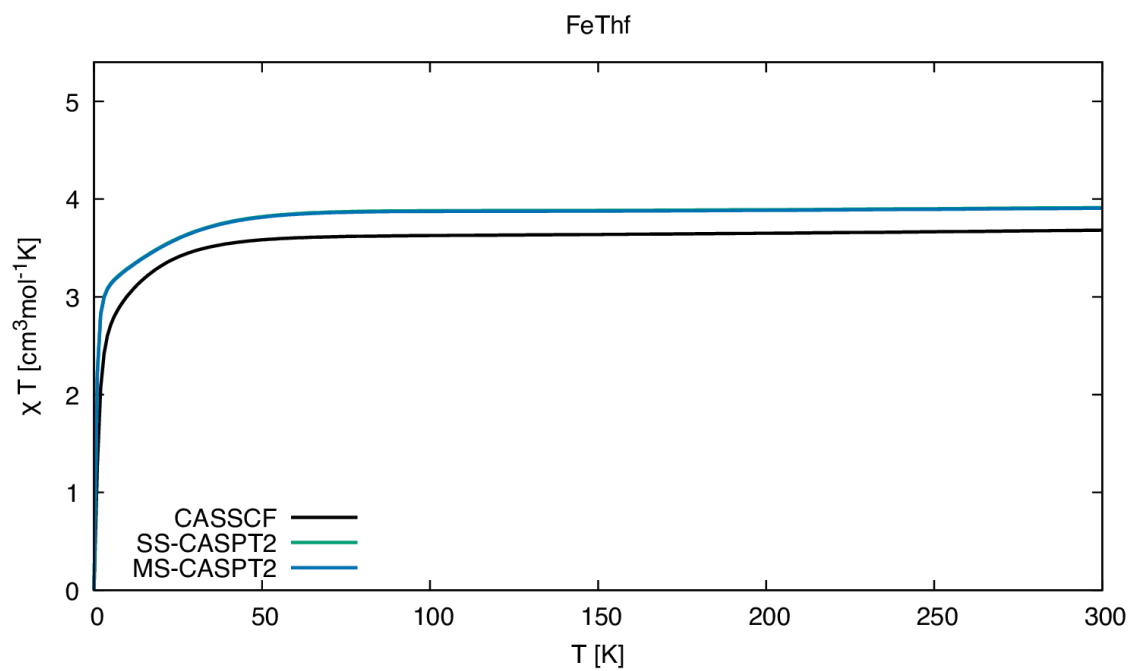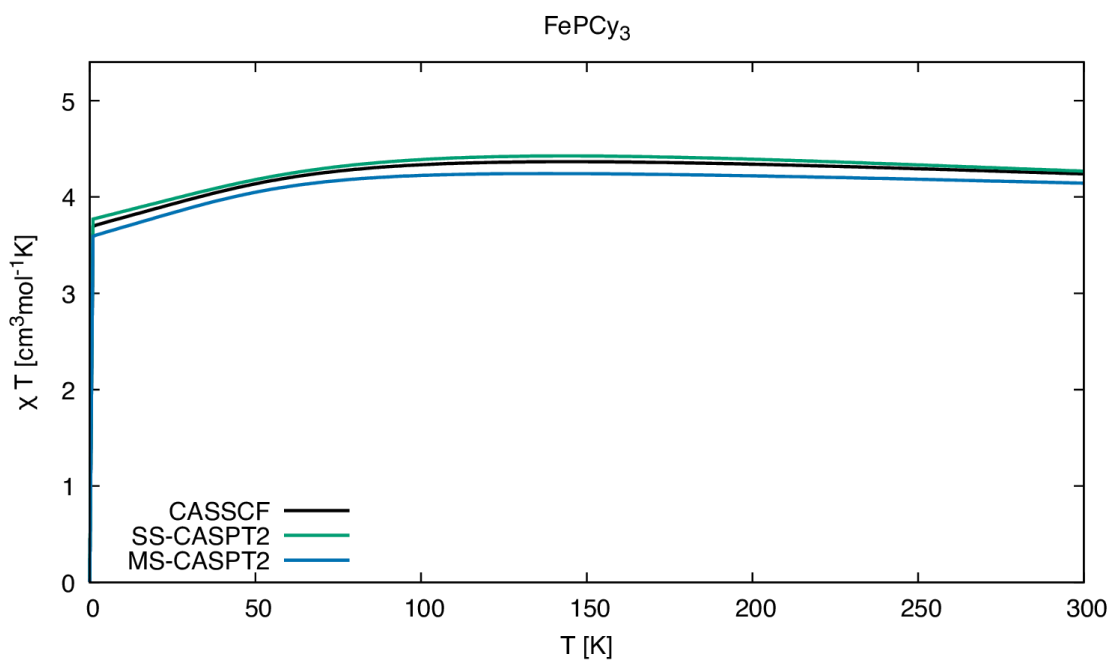

**Figure S26.** Temperature dependence of  $\chi T$  for **6** (up) and **7** (below) calculated by quantum chemical methods.



a)

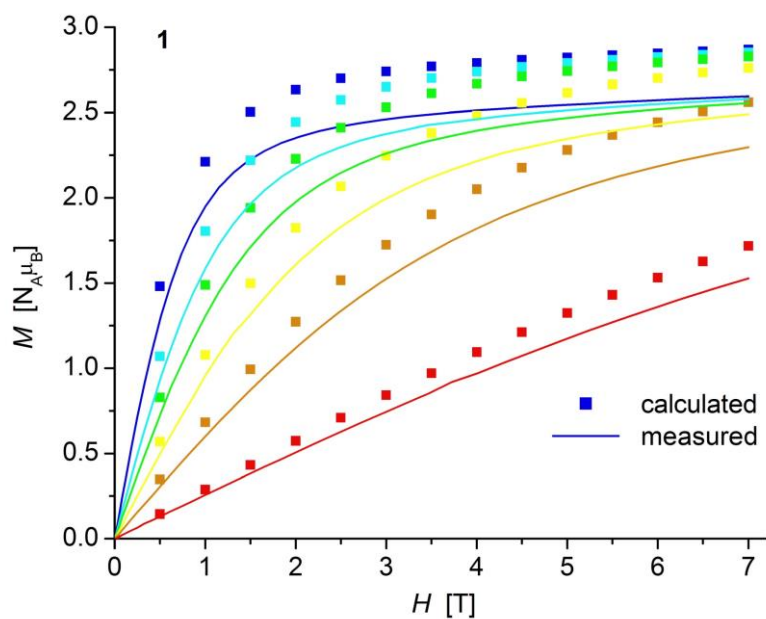

b)

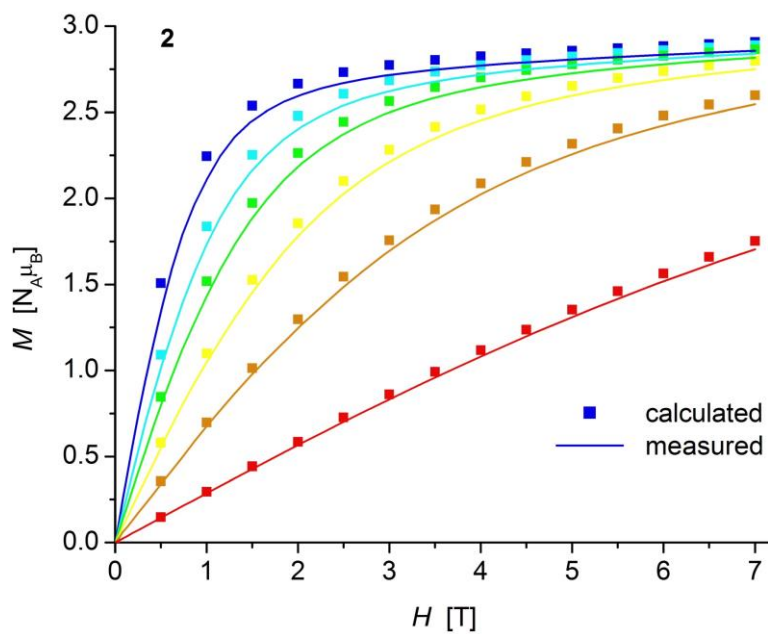

**Figure S27.** Comparison of the magnetization curves  $M$  versus  $H$  for a) [Fe{N(SiMe<sub>3</sub>)<sub>2</sub>}<sub>2</sub>PPh<sub>3</sub>] (1) and b) [Fe{N(SiMe<sub>3</sub>)<sub>2</sub>}<sub>2</sub>PMe<sub>3</sub>] (2) calculated by quantum chemical methods (square dots) and measured (solid line) at 2, 3, 4, 6, 10 and 25 K.

a)

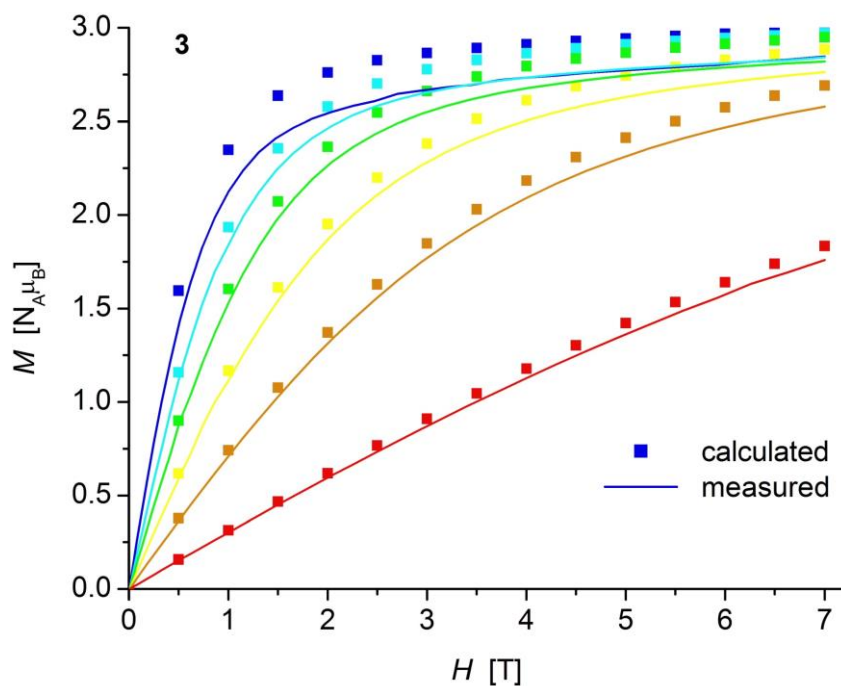

b)

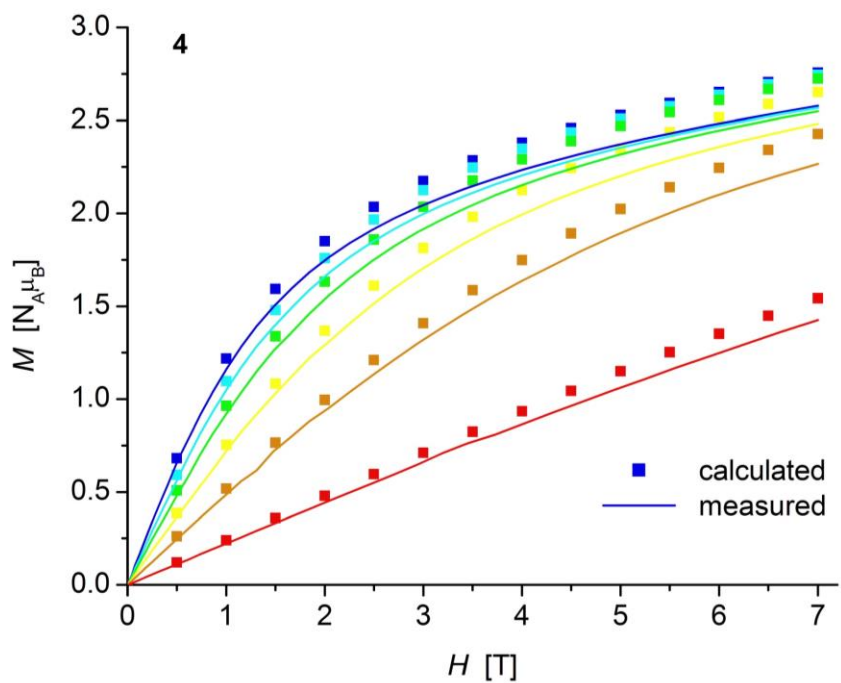

**Figure S28.** Comparison of the magnetization curves  $M$  versus  $H$  for a)  $[\text{Fe}\{\text{N}(\text{SiMe}_3)_2\}_2\text{AsPh}_3]$  (**3**) and b)  $[\text{Fe}\{\text{N}(\text{SiMe}_3)_2\}_2\text{OPPh}_3]$  (**4**) calculated by quantum chemical methods (square dots) and measured (solid line) at 2, 3, 4, 6, 10 and 25 K.

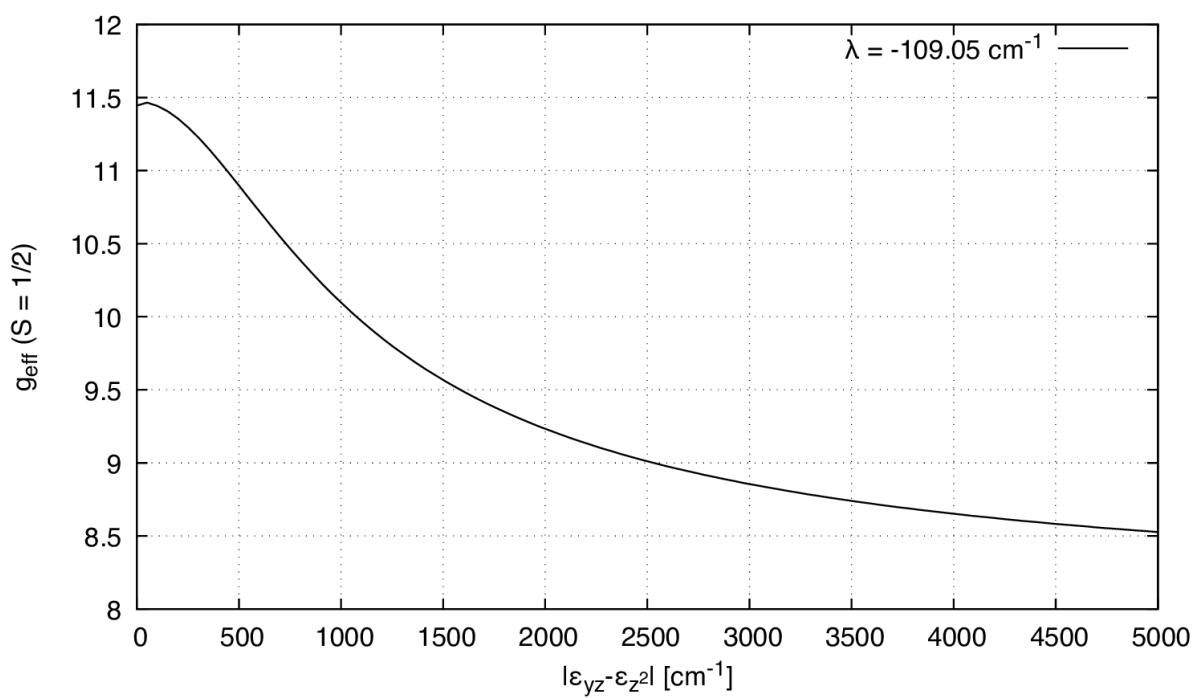

**Figure S29.** Relation between  $g_z$  and the splitting  $\Delta\epsilon$  according to eqn (1)†.

**Table S8** d-orbital splittings of **1–7** derived from different quantum chemical methods. All energies are given in  $\text{cm}^{-1}$  <sup>a</sup>

|           |               | CAS(5,5)SCF <sup>b</sup> | CAS(6,5)CI <sup>c</sup> | CAS(6,5)SCF <sup>d</sup> | CAS(12,13)SCF <sup>e</sup> | TDDFT <sup>f</sup> |
|-----------|---------------|--------------------------|-------------------------|--------------------------|----------------------------|--------------------|
|           |               | LF                       | LF+d-d                  | LF+d-d+rel.              |                            |                    |
| <b>1</b>  | $d_{yz}$      | 0                        | 0                       | 0                        | 0                          | 0                  |
|           | $d_{z^2}$     | 693                      | 514                     | 378                      | 540                        | 1564               |
|           | $d_{xz}$      | 3823                     | 3277                    | 3389                     | 3218                       | 5050               |
|           | $d_{xy}$      | 83778                    | 8060                    | 7969                     | 8316                       | 10221              |
|           | $d_{x^2-y^2}$ | 10227                    | 10439                   | 10345                    | 10978                      | 12643              |
|           |               |                          |                         |                          |                            |                    |
| <b>2</b>  | $d_{yz}$      | 0                        | 0                       | 0                        | 0                          | 0                  |
|           | $d_{z^2}$     | 2398                     | 630                     | 491                      | 192                        | 2003               |
|           | $d_{xz}$      | 3319                     | 3464                    | 3587                     | 4046                       | 5380               |
|           | $d_{xy}$      | 8615                     | 8124                    | 8053                     | 8420                       | 10506              |
|           | $d_{x^2-y^2}$ | 9876                     | 11360                   | 11249                    | 11446                      | 14158              |
|           |               |                          |                         |                          |                            |                    |
| <b>3</b>  | $d_{yz}$      | 0                        | 0                       | 0                        | 0                          | 0                  |
|           | $d_{z^2}$     | 636                      | 567                     | 448                      | 176                        | 1722               |
|           | $d_{xz}$      | 5705                     | 3681                    | 3806                     | 3725                       | 4833               |
|           | $d_{xy}$      | 7777                     | 8088                    | 8028                     | 7692                       | 10125              |
|           | $d_{x^2-y^2}$ | 10107                    | 10421                   | 10269                    | 10357                      | 12946              |
|           |               |                          |                         |                          |                            |                    |
| <b>4</b>  | $d_{yz}$      | 633                      | 560                     | 746                      | 2133                       | 3247               |
|           | $d_{z^2}$     | 0                        | 0                       | 0                        | 0                          | 0                  |
|           | $d_{xz}$      | 2685                     | 2487                    | 2746                     | 3519                       | 5609               |
|           | $d_{xy}$      | 9385                     | 8405                    | 8570                     | 9414                       | 9937               |
|           | $d_{x^2-y^2}$ | 11348                    | 10334                   | 10473                    | 11767                      | 11529              |
|           |               |                          |                         |                          |                            |                    |
| <b>5a</b> | $d_{yz}$      | 585                      | 195                     | 234                      | 1123                       | 1580               |
|           | $d_{z^2}$     | 0                        | 0                       | 0                        | 0                          | 0                  |
|           | $d_{xz}$      | 3088                     | 2750                    | 2957                     | 3468                       | 5523               |
|           | $d_{xy}$      | 8149                     | 7619                    | 7698                     | 8253                       | 9596               |
|           | $d_{x^2-y^2}$ | 11553                    | 11175                   | 11190                    | 12244                      | 12943              |

|           |               |       |       |       |       |       |
|-----------|---------------|-------|-------|-------|-------|-------|
|           |               |       |       |       |       |       |
| <b>5b</b> | $d_{yz}$      | 433   | 62    | 256   | 1191  | 1367  |
|           | $d_{z^2}$     | 0     | 0     | 0     | 0     | 0     |
|           | $d_{xz}$      | 2680  | 2459  | 2751  | 3318  | 5266  |
|           | $d_{xy}$      | 7299  | 8089  | 8235  | 8783  | 10307 |
|           | $d_{x^2-y^2}$ | 10487 | 11224 | 11335 | 12432 | 13072 |
|           |               |       |       |       |       |       |
| <b>6</b>  | $d_{yz}$      | 48    | 197   | 378   | 1395  | 2600  |
|           | $d_{z^2}$     | 0     | 0     | 0     | 0     | 0     |
|           | $d_{xz}$      | 2870  | 2819  | 3107  | 3657  | 5860  |
|           | $d_{xy}$      | 8630  | 7996  | 8163  | 8801  | 9722  |
|           | $d_{x^2-y^2}$ | 10964 | 10303 | 10373 | 11346 | 11432 |
|           |               |       |       |       |       |       |
| <b>7</b>  | $d_{yz}$      | 0     | 0     | 0     | 0     | 0     |
|           | $d_{z^2}$     | 1723  | 525   | 391   | 187   | 1722  |
|           | $d_{xz}$      | 3712  | 2993  | 3076  | 3166  | 4833  |
|           | $d_{xy}$      | 7005  | 8025  | 7930  | 7529  | 10125 |
|           | $d_{x^2-y^2}$ | 10180 | 10129 | 10084 | 10785 | 12946 |

<sup>a</sup> The CAS values were obtained from energies and occupation of the natural orbitals constructed for the five lowest roots. The TDDFT values were obtained from the Jacobian constructed by considering single excitations on top of the ground state.

<sup>b</sup> CAS(5,5)SCF: calculations performed on a Mn(II) ( $d^5$ ) equivalent to eliminate d-d-correlation effects. These calculations therefore only contain ligand field effects.

<sup>c</sup> CAS(6,5)CI: based on CAS(5,5)SCF orbitals, these Fe(II) calculations account additionally for correlation within the 3d shell.

<sup>d</sup> CAS(6,5)SCF: same as CAS(6,5)CI, but with relaxed orbitals.

<sup>e</sup> CAS(12,13)PT2: reference values including both static and dynamic correlation based on multi-reference wave functions.

<sup>f</sup> TDDFT: reference values including both dynamical and static correlation to some extent by means of the B3-LYP functional. TDDFT values of **1–3** and **7** are unreliable due to quasi-degeneracy.

**Table S9** Coefficients of the crystal field Hamiltonian decomposition (eqn (1)) for complexes **1–7** (in cm<sup>-1</sup>)

| $B(k,q)$ | <b>1</b> | <b>2</b> | <b>3</b> | <b>4</b> | <b>5a</b> | <b>5b</b> | <b>6</b> | <b>7</b> |
|----------|----------|----------|----------|----------|-----------|-----------|----------|----------|
| 2,-2     | -29      | 19       | -45      | -7       | -11       | 0         | 0        | 15       |
| 2,-1     | 118      | -79      | -164     | -212     | 56        | 0         | 0        | -14      |
| 2,0      | 742      | 780      | 715      | 811      | 809       | 851       | 783      | 739      |
| 2,1      | 4        | 198      | -33      | 155      | -86       | -36       | 24       | -182     |
| 2,2      | -521     | -537     | -597     | -278     | -375      | -350      | -363     | -471     |
| 4,-4     | 8        | -4       | 0        | 30       | -8        | 0         | 0        | -4       |
| 4,-3     | 52       | -14      | -44      | -6       | 14        | 0         | 0        | -5       |
| 4,-2     | 4        | 2        | 5        | 6        | 2         | 0         | 0        | 1        |
| 4,-1     | 13       | -4       | -13      | -14      | -6        | 0         | 0        | 5        |
| 4,0      | 10       | 11       | 9        | 6        | 8         | 10        | 6        | 10       |
| 4,1      | -14      | 21       | 12       | 12       | 4         | 5         | 17       | -11      |
| 4,2      | 9        | 18       | 8        | 16       | 21        | 16        | 24       | 12       |
| 4,3      | 108      | -111     | -115     | -135     | -112      | 1         | -193     | 115      |
| 4,4      | 85       | 119      | 75       | 70       | 142       | 125       | 87       | 77       |

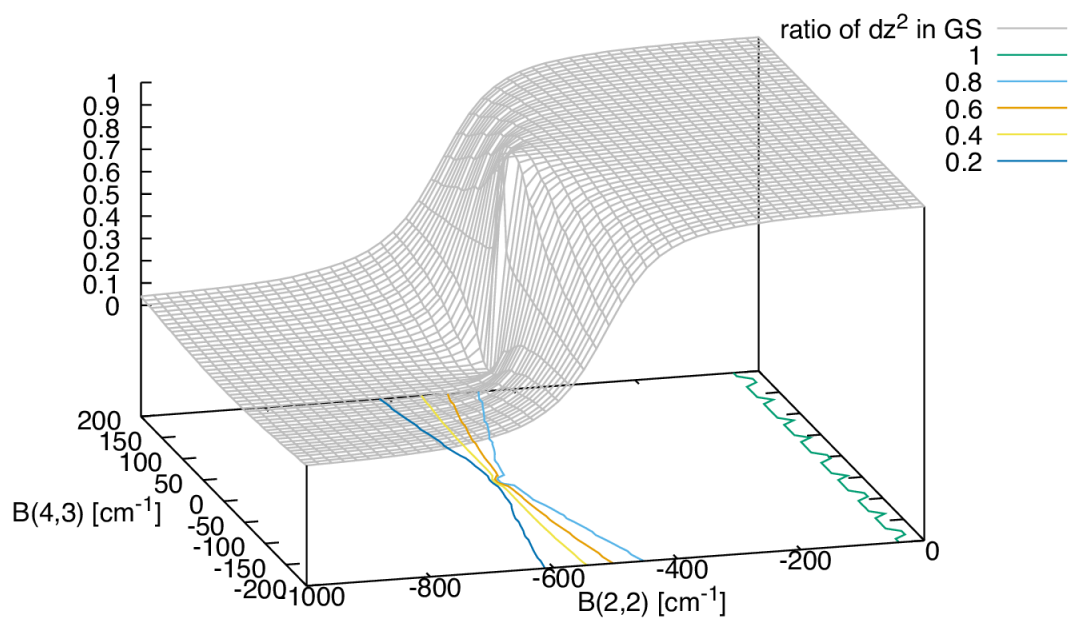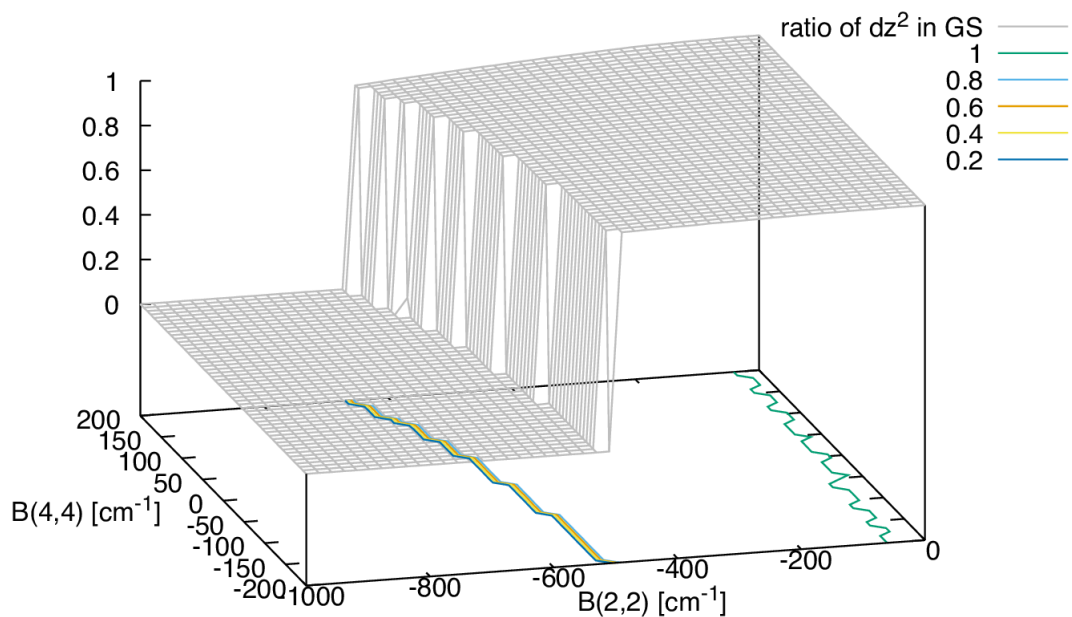

**Figure S30.** Simulation of the influence of  $B_2^2$  and  $B_4^3$  parameters (up) as well as  $B_2^2$  and  $B_4^4$  parameters (below) in the effective Hamiltonian eqn (1) on the symmetry of its ground state for fixed axial parameters  $B_2^0 = 779 \text{ cm}^{-1}$  and  $B_4^0 = 9 \text{ cm}^{-1}$  (Table S9).

**Table S10** Eigenvalues  $E$  (in  $\text{cm}^{-1}$ ) of the Spin Hamiltonian (eqn (3)) for  $S = 2$  with  $D$  and  $E$  taken from Table 7.

|           | $E$ |   |     |     |     |
|-----------|-----|---|-----|-----|-----|
| <b>1</b>  | 0   | 0 | 161 | 165 | 217 |
| <b>2</b>  | 0   | 0 | 146 | 150 | 198 |
| <b>3</b>  | 0   | 0 | 168 | 173 | 227 |
| <b>4</b>  | 0   | 4 | 27  | 53  | 57  |
| <b>5a</b> | 0   | 1 | 84  | 103 | 125 |
| <b>5b</b> | 0   | 1 | 73  | 94  | 112 |
| <b>6</b>  | 0   | 2 | 62  | 83  | 98  |
| <b>7</b>  | 0   | 0 | 154 | 161 | 210 |



## References

- (1) N. F. Chilton, R. P. Anderson, L. D. Turner, A. Soncini and K. S. Murray, *J. Comput. Chem.*, 2013, **34**, 1164-1175.
- (2) Aubin, S. M. J.; Sun, Z. M.; Pardi, L.; Krzystek, J.; Folting, K.; Brunel, L. C.; Rheingold, A. L.; Christou, G.; Hendrickson, D. N. *Inorg. Chem.* 1999, **38**, 5329.
- (3) Atanasov, M.; Zadrozny, Long, J. R.; Neese, F.; *Chem. Sci*, 2013, **4**, 139-156.
- (4) A. Fort, A. Rettori, J. Villain, D. Gatteschi, R. Sessoli, *Phys. Rev. Lett.* 1998, **80**, 612.
- (5) R. L. Carlin, A. J. Duynveldt, *Magnetic Properties of Transition Metal Compounds*, Springer, Berlin, Heidelberg, New York, 1977.
- (6) P.-A. Lindgård, *J. Phys. C: Solid State Physics*, 1975, **8**(20), 3401–3407.
